# Supplementary material for: Comparative Developmental Expression Profiling of Two C. elegans Isolates
Source: PLoS One. 2008 Dec 31;3(12):e4055. doi: 10.1371/journal.pone.0004055 (PMC2605249; doi:10.1371/journal.pone.0004055)
Supplement: Table S5 — Supplementary table 5 (0.18 MB XLS) [file pone.0004055.s005.xls]

## Sheet: bestDNAmotif_function_a.txt
Table S5. Best motifs and putative functions for unannotated genes.
The best motif was defined by the maximum pa+po+pd values, with the requirement that the sum be greater than 4 to indicate the real presence of a motif.
GO-enrichments for both the motif and the cluster were used for putative functional annotations, as was the function of the transcription factor binding to the motif, if known.
Gene Name	Cluster	Best Motif	pa+po+pd	putative function (named motif)
ZK896.4	1	.TCCACG[ACG].	6.5	vulval development (O2)
B0334.1	1	.C[CT]TATCA.	8.9	carbohydrate binding (GATA-1)
B0416.7	1	.C[CT]TATCA.	8.9	carbohydrate binding (GATA-1)
B0457.2	1	.C[CT]TATCA.	8.9	carbohydrate binding (GATA-1)
B0511.5	1	.C[CT]TATCA.	8.9	carbohydrate binding (GATA-1)
B0564.6	1	.C[CT]TATCA.	8.9	carbohydrate binding (GATA-1)
C01H6.3	1	.C[CT]TATCA.	8.9	carbohydrate binding (GATA-1)
C02H6.2	1	.C[CT]TATCA.	8.9	carbohydrate binding (GATA-1)
C03B1.14	1	.C[CT]TATCA.	8.9	carbohydrate binding (GATA-1)
C03G6.5	1	.C[CT]TATCA.	8.9	carbohydrate binding (GATA-1)
C04E6.8	1	.C[CT]TATCA.	8.9	carbohydrate binding (GATA-1)
C06E1.5	1	.C[CT]TATCA.	8.9	carbohydrate binding (GATA-1)
C06E4.8	1	.C[CT]TATCA.	8.9	carbohydrate binding (GATA-1)
C07D10.1	1	.C[CT]TATCA.	8.9	carbohydrate binding (GATA-1)
C09D1.2	1	.C[CT]TATCA.	8.9	carbohydrate binding (GATA-1)
C12D8.17	1	.C[CT]TATCA.	8.9	carbohydrate binding (GATA-1)
C13A10.2	1	.C[CT]TATCA.	8.9	carbohydrate binding (GATA-1)
C15F1.1	1	.C[CT]TATCA.	8.9	carbohydrate binding (GATA-1)
C15H9.11	1	.C[CT]TATCA.	8.9	carbohydrate binding (GATA-1)
C15H9.9	1	.C[CT]TATCA.	8.9	carbohydrate binding (GATA-1)
C17F4.7	1	.C[CT]TATCA.	8.9	carbohydrate binding (GATA-1)
C17H12.8	1	.C[CT]TATCA.	8.9	carbohydrate binding (GATA-1)
C23G10.2	1	.C[CT]TATCA.	8.9	carbohydrate binding (GATA-1)
C25E10.9	1	.C[CT]TATCA.	8.9	carbohydrate binding (GATA-1)
C28H8.2	1	.C[CT]TATCA.	8.9	carbohydrate binding (GATA-1)
C29E4.7	1	.C[CT]TATCA.	8.9	carbohydrate binding (GATA-1)
C29F9.4	1	.C[CT]TATCA.	8.9	carbohydrate binding (GATA-1)
C29G2.6	1	.C[CT]TATCA.	8.9	carbohydrate binding (GATA-1)
C33B4.2	1	.C[CT]TATCA.	8.9	carbohydrate binding (GATA-1)
C33H5.13	1	.C[CT]TATCA.	8.9	carbohydrate binding (GATA-1)
C34D1.5	1	.C[CT]TATCA.	8.9	carbohydrate binding (GATA-1)
C34E11.4	1	.C[CT]TATCA.	8.9	carbohydrate binding (GATA-1)
C34H4.3	1	.C[CT]TATCA.	8.9	carbohydrate binding (GATA-1)
C35C5.9	1	.C[CT]TATCA.	8.9	carbohydrate binding (GATA-1)
C37A5.8	1	.C[CT]TATCA.	8.9	carbohydrate binding (GATA-1)
C40D2.2	1	.C[CT]TATCA.	8.9	carbohydrate binding (GATA-1)
C44B11.6	1	.C[CT]TATCA.	8.9	carbohydrate binding (GATA-1)
C44B7.3	1	.C[CT]TATCA.	8.9	carbohydrate binding (GATA-1)
C46G7.2	1	.C[CT]TATCA.	8.9	carbohydrate binding (GATA-1)
C50F4.9	1	.C[CT]TATCA.	8.9	carbohydrate binding (GATA-1)
C52D10.3	1	.C[CT]TATCA.	8.9	carbohydrate binding (GATA-1)
C53B4.7	1	.C[CT]TATCA.	8.9	carbohydrate binding (GATA-1)
C55F2.2	1	.C[CT]TATCA.	8.9	carbohydrate binding (GATA-1)
C56A3.2	1	.C[CT]TATCA.	8.9	carbohydrate binding (GATA-1)
D1086.5	1	.C[CT]TATCA.	8.9	carbohydrate binding (GATA-1)
D1086.8	1	.C[CT]TATCA.	8.9	carbohydrate binding (GATA-1)
D2030.5	1	.C[CT]TATCA.	8.9	carbohydrate binding (GATA-1)
D2085.7	1	.C[CT]TATCA.	8.9	carbohydrate binding (GATA-1)
E01G6.2	1	.C[CT]TATCA.	8.9	carbohydrate binding (GATA-1)
E02C12.6	1	.C[CT]TATCA.	8.9	carbohydrate binding (GATA-1)
E02H1.8	1	.C[CT]TATCA.	8.9	carbohydrate binding (GATA-1)
F01D5.1	1	.C[CT]TATCA.	8.9	carbohydrate binding (GATA-1)
F08D12.7	1	.C[CT]TATCA.	8.9	carbohydrate binding (GATA-1)
F08H9.5	1	.C[CT]TATCA.	8.9	carbohydrate binding (GATA-1)
F09E10.7	1	.C[CT]TATCA.	8.9	carbohydrate binding (GATA-1)
F10A3.2	1	.C[CT]TATCA.	8.9	carbohydrate binding (GATA-1)
F10C1.8	1	.C[CT]TATCA.	8.9	carbohydrate binding (GATA-1)
F11F1.6	1	.C[CT]TATCA.	8.9	carbohydrate binding (GATA-1)
F13H6.3	1	.C[CT]TATCA.	8.9	carbohydrate binding (GATA-1)
F14F3.4	1	.C[CT]TATCA.	8.9	carbohydrate binding (GATA-1)
F15E11.1	1	.C[CT]TATCA.	8.9	carbohydrate binding (GATA-1)
F15E11.15	1	.C[CT]TATCA.	8.9	carbohydrate binding (GATA-1)
F16B4.7	1	.C[CT]TATCA.	8.9	carbohydrate binding (GATA-1)
F16C3.2	1	.C[CT]TATCA.	8.9	carbohydrate binding (GATA-1)
F17C11.5	1	.C[CT]TATCA.	8.9	carbohydrate binding (GATA-1)
F19H6.1	1	.C[CT]TATCA.	8.9	carbohydrate binding (GATA-1)
F21E9.3	1	.C[CT]TATCA.	8.9	carbohydrate binding (GATA-1)
F22H10.3	1	.C[CT]TATCA.	8.9	carbohydrate binding (GATA-1)
F26G1.2	1	.C[CT]TATCA.	8.9	carbohydrate binding (GATA-1)
F27C8.2	1	.C[CT]TATCA.	8.9	carbohydrate binding (GATA-1)
F27C8.4	1	.C[CT]TATCA.	8.9	carbohydrate binding (GATA-1)
F32D8.9	1	.C[CT]TATCA.	8.9	carbohydrate binding (GATA-1)
F35B12.10	1	.C[CT]TATCA.	8.9	carbohydrate binding (GATA-1)
F35B12.8	1	.C[CT]TATCA.	8.9	carbohydrate binding (GATA-1)
F35C12.3	1	.C[CT]TATCA.	8.9	carbohydrate binding (GATA-1)
F35F10.7	1	.C[CT]TATCA.	8.9	carbohydrate binding (GATA-1)
F36D3.10	1	.C[CT]TATCA.	8.9	carbohydrate binding (GATA-1)
F36H12.1	1	.C[CT]TATCA.	8.9	carbohydrate binding (GATA-1)
F39E9.2	1	.C[CT]TATCA.	8.9	carbohydrate binding (GATA-1)
F40A3.6	1	.C[CT]TATCA.	8.9	carbohydrate binding (GATA-1)
F41E6.12	1	.C[CT]TATCA.	8.9	carbohydrate binding (GATA-1)
F42A10.7	1	.C[CT]TATCA.	8.9	carbohydrate binding (GATA-1)
F44A6.5	1	.C[CT]TATCA.	8.9	carbohydrate binding (GATA-1)
F44E2.9	1	.C[CT]TATCA.	8.9	carbohydrate binding (GATA-1)
F45C12.4	1	.C[CT]TATCA.	8.9	carbohydrate binding (GATA-1)
F45D3.3	1	.C[CT]TATCA.	8.9	carbohydrate binding (GATA-1)
F46C5.4	1	.C[CT]TATCA.	8.9	carbohydrate binding (GATA-1)
F46F3.3	1	.C[CT]TATCA.	8.9	carbohydrate binding (GATA-1)
F46H5.5	1	.C[CT]TATCA.	8.9	carbohydrate binding (GATA-1)
F47C10.2	1	.C[CT]TATCA.	8.9	carbohydrate binding (GATA-1)
F49C12.14	1	.C[CT]TATCA.	8.9	carbohydrate binding (GATA-1)
F49C5.5	1	.C[CT]TATCA.	8.9	carbohydrate binding (GATA-1)
F52E1.7	1	.C[CT]TATCA.	8.9	carbohydrate binding (GATA-1)
F53C11.1	1	.C[CT]TATCA.	8.9	carbohydrate binding (GATA-1)
F53F1.4	1	.C[CT]TATCA.	8.9	carbohydrate binding (GATA-1)
F54C9.3	1	.C[CT]TATCA.	8.9	carbohydrate binding (GATA-1)
F54D10.2	1	.C[CT]TATCA.	8.9	carbohydrate binding (GATA-1)
F54D5.3	1	.C[CT]TATCA.	8.9	carbohydrate binding (GATA-1)
F54D7.4	1	.C[CT]TATCA.	8.9	carbohydrate binding (GATA-1)
F54E2.1	1	.C[CT]TATCA.	8.9	carbohydrate binding (GATA-1)
F55F3.4	1	.C[CT]TATCA.	8.9	carbohydrate binding (GATA-1)
F55G11.8	1	.C[CT]TATCA.	8.9	carbohydrate binding (GATA-1)
F56C4.3	1	.C[CT]TATCA.	8.9	carbohydrate binding (GATA-1)
F58B4.3	1	.C[CT]TATCA.	8.9	carbohydrate binding (GATA-1)
F58G1.4	1	.C[CT]TATCA.	8.9	carbohydrate binding (GATA-1)
F58H1.4	1	.C[CT]TATCA.	8.9	carbohydrate binding (GATA-1)
F58H10.1	1	.C[CT]TATCA.	8.9	carbohydrate binding (GATA-1)
H05L03.3	1	.C[CT]TATCA.	8.9	carbohydrate binding (GATA-1)
K03H1.6	1	.C[CT]TATCA.	8.9	carbohydrate binding (GATA-1)
K06A4.7	1	.C[CT]TATCA.	8.9	carbohydrate binding (GATA-1)
K07A1.10	1	.C[CT]TATCA.	8.9	carbohydrate binding (GATA-1)
K08D8.6	1	.C[CT]TATCA.	8.9	carbohydrate binding (GATA-1)
K08F4.7	1	.C[CT]TATCA.	8.9	carbohydrate binding (GATA-1)
K10D11.2	1	.C[CT]TATCA.	8.9	carbohydrate binding (GATA-1)
M02H5.8	1	.C[CT]TATCA.	8.9	carbohydrate binding (GATA-1)
M03F8.6	1	.C[CT]TATCA.	8.9	carbohydrate binding (GATA-1)
M04C9.4	1	.C[CT]TATCA.	8.9	carbohydrate binding (GATA-1)
M79.4	1	.C[CT]TATCA.	8.9	carbohydrate binding (GATA-1)
R01E6.6	1	.C[CT]TATCA.	8.9	carbohydrate binding (GATA-1)
R06B10.3	1	.C[CT]TATCA.	8.9	carbohydrate binding (GATA-1)
R07B1.4	1	.C[CT]TATCA.	8.9	carbohydrate binding (GATA-1)
R09A1.3	1	.C[CT]TATCA.	8.9	carbohydrate binding (GATA-1)
R102.2	1	.C[CT]TATCA.	8.9	carbohydrate binding (GATA-1)
R10E8.8	1	.C[CT]TATCA.	8.9	carbohydrate binding (GATA-1)
R10H1.1	1	.C[CT]TATCA.	8.9	carbohydrate binding (GATA-1)
R11G11.6	1	.C[CT]TATCA.	8.9	carbohydrate binding (GATA-1)
R13A5.3	1	.C[CT]TATCA.	8.9	carbohydrate binding (GATA-1)
R13H4.5	1	.C[CT]TATCA.	8.9	carbohydrate binding (GATA-1)
T01B7.9	1	.C[CT]TATCA.	8.9	carbohydrate binding (GATA-1)
T05A10.6	1	.C[CT]TATCA.	8.9	carbohydrate binding (GATA-1)
T05C1.3	1	.C[CT]TATCA.	8.9	carbohydrate binding (GATA-1)
T07C12.7	1	.C[CT]TATCA.	8.9	carbohydrate binding (GATA-1)
T08E11.2	1	.C[CT]TATCA.	8.9	carbohydrate binding (GATA-1)
T10B5.10	1	.C[CT]TATCA.	8.9	carbohydrate binding (GATA-1)
T10B9.9	1	.C[CT]TATCA.	8.9	carbohydrate binding (GATA-1)
T12B5.13	1	.C[CT]TATCA.	8.9	carbohydrate binding (GATA-1)
T12B5.2	1	.C[CT]TATCA.	8.9	carbohydrate binding (GATA-1)
T12B5.8	1	.C[CT]TATCA.	8.9	carbohydrate binding (GATA-1)
T19C3.9	1	.C[CT]TATCA.	8.9	carbohydrate binding (GATA-1)
T19E7.1	1	.C[CT]TATCA.	8.9	carbohydrate binding (GATA-1)
T20D4.12	1	.C[CT]TATCA.	8.9	carbohydrate binding (GATA-1)
T21C9.8	1	.C[CT]TATCA.	8.9	carbohydrate binding (GATA-1)
T22C8.5	1	.C[CT]TATCA.	8.9	carbohydrate binding (GATA-1)
T22H6.5	1	.C[CT]TATCA.	8.9	carbohydrate binding (GATA-1)
T23F6.5	1	.C[CT]TATCA.	8.9	carbohydrate binding (GATA-1)
T26C5.4	1	.C[CT]TATCA.	8.9	carbohydrate binding (GATA-1)
T27E4.4	1	.C[CT]TATCA.	8.9	carbohydrate binding (GATA-1)
T27E4.7	1	.C[CT]TATCA.	8.9	carbohydrate binding (GATA-1)
T28B4.3	1	.C[CT]TATCA.	8.9	carbohydrate binding (GATA-1)
T28D6.3	1	.C[CT]TATCA.	8.9	carbohydrate binding (GATA-1)
W02G9.4	1	.C[CT]TATCA.	8.9	carbohydrate binding (GATA-1)
W06B11.3	1	.C[CT]TATCA.	8.9	carbohydrate binding (GATA-1)
W10C8.4	1	.C[CT]TATCA.	8.9	carbohydrate binding (GATA-1)
Y119D3B.13	1	.C[CT]TATCA.	8.9	carbohydrate binding (GATA-1)
Y119D3B.21	1	.C[CT]TATCA.	8.9	carbohydrate binding (GATA-1)
Y119D3B.7	1	.C[CT]TATCA.	8.9	carbohydrate binding (GATA-1)
Y119D3B.8	1	.C[CT]TATCA.	8.9	carbohydrate binding (GATA-1)
Y12A6A.1	1	.C[CT]TATCA.	8.9	carbohydrate binding (GATA-1)
Y19D10A.3	1	.C[CT]TATCA.	8.9	carbohydrate binding (GATA-1)
Y19D10B.4	1	.C[CT]TATCA.	8.9	carbohydrate binding (GATA-1)
Y22D7AR.11	1	.C[CT]TATCA.	8.9	carbohydrate binding (GATA-1)
Y22D7AR.9	1	.C[CT]TATCA.	8.9	carbohydrate binding (GATA-1)
Y23B4A.2	1	.C[CT]TATCA.	8.9	carbohydrate binding (GATA-1)
Y34B4A.5	1	.C[CT]TATCA.	8.9	carbohydrate binding (GATA-1)
Y37D8A.15	1	.C[CT]TATCA.	8.9	carbohydrate binding (GATA-1)
Y37E11AR.4	1	.C[CT]TATCA.	8.9	carbohydrate binding (GATA-1)
Y38C1AB.7	1	.C[CT]TATCA.	8.9	carbohydrate binding (GATA-1)
Y38F1A.9	1	.C[CT]TATCA.	8.9	carbohydrate binding (GATA-1)
Y41C4A.12	1	.C[CT]TATCA.	8.9	carbohydrate binding (GATA-1)
Y42A5A.3	1	.C[CT]TATCA.	8.9	carbohydrate binding (GATA-1)
Y42G9A.2	1	.C[CT]TATCA.	8.9	carbohydrate binding (GATA-1)
Y43F8C.13	1	.C[CT]TATCA.	8.9	carbohydrate binding (GATA-1)
Y43F8C.2	1	.C[CT]TATCA.	8.9	carbohydrate binding (GATA-1)
Y51A2D.10	1	.C[CT]TATCA.	8.9	carbohydrate binding (GATA-1)
Y51A2D.11	1	.C[CT]TATCA.	8.9	carbohydrate binding (GATA-1)
Y51A2D.4	1	.C[CT]TATCA.	8.9	carbohydrate binding (GATA-1)
Y51H4A.8	1	.C[CT]TATCA.	8.9	carbohydrate binding (GATA-1)
Y53F4B.29	1	.C[CT]TATCA.	8.9	carbohydrate binding (GATA-1)
Y54E5A.5	1	.C[CT]TATCA.	8.9	carbohydrate binding (GATA-1)
Y54G2A.10	1	.C[CT]TATCA.	8.9	carbohydrate binding (GATA-1)
Y57A10C.6	1	.C[CT]TATCA.	8.9	carbohydrate binding (GATA-1)
Y57G11A.4	1	.C[CT]TATCA.	8.9	carbohydrate binding (GATA-1)
Y57G11B.2	1	.C[CT]TATCA.	8.9	carbohydrate binding (GATA-1)
Y57G7A.1	1	.C[CT]TATCA.	8.9	carbohydrate binding (GATA-1)
Y5F2A.2	1	.C[CT]TATCA.	8.9	carbohydrate binding (GATA-1)
Y60A3A.21	1	.C[CT]TATCA.	8.9	carbohydrate binding (GATA-1)
Y66H1A.5	1	.C[CT]TATCA.	8.9	carbohydrate binding (GATA-1)
Y69H2.13	1	.C[CT]TATCA.	8.9	carbohydrate binding (GATA-1)
Y71H2AM.14	1	.C[CT]TATCA.	8.9	carbohydrate binding (GATA-1)
Y75B12B.3	1	.C[CT]TATCA.	8.9	carbohydrate binding (GATA-1)
Y82E9BL.10	1	.C[CT]TATCA.	8.9	carbohydrate binding (GATA-1)
Y82E9BR.21	1	.C[CT]TATCA.	8.9	carbohydrate binding (GATA-1)
ZC47.4	1	.C[CT]TATCA.	8.9	carbohydrate binding (GATA-1)
ZC581.1	1	.C[CT]TATCA.	8.9	carbohydrate binding (GATA-1)
ZK1053.5	1	.C[CT]TATCA.	8.9	carbohydrate binding (GATA-1)
ZK1307.2	1	.C[CT]TATCA.	8.9	carbohydrate binding (GATA-1)
ZK1320.2	1	.C[CT]TATCA.	8.9	carbohydrate binding (GATA-1)
ZK1320.3	1	.C[CT]TATCA.	8.9	carbohydrate binding (GATA-1)
ZK154.1	1	.C[CT]TATCA.	8.9	carbohydrate binding (GATA-1)
ZK228.3	1	.C[CT]TATCA.	8.9	carbohydrate binding (GATA-1)
ZK370.6	1	.C[CT]TATCA.	8.9	carbohydrate binding (GATA-1)
ZK669.2	1	.C[CT]TATCA.	8.9	carbohydrate binding (GATA-1)
ZK673.9	1	.C[CT]TATCA.	8.9	carbohydrate binding (GATA-1)
ZK697.6	1	.C[CT]TATCA.	8.9	carbohydrate binding (GATA-1)
ZK813.4	1	.C[CT]TATCA.	8.9	carbohydrate binding (GATA-1)
ZK899.1	1	.C[CT]TATCA.	8.9	carbohydrate binding (GATA-1)
B0457.6	6	.C[CT]TATCA.	10.5	carbohydrate binding (GATA-1)
C01B10.6	6	.C[CT]TATCA.	10.5	carbohydrate binding (GATA-1)
C14F5.3	6	.C[CT]TATCA.	10.5	carbohydrate binding (GATA-1)
C15C7.4	6	.C[CT]TATCA.	10.5	carbohydrate binding (GATA-1)
C18B2.5	6	.C[CT]TATCA.	10.5	carbohydrate binding (GATA-1)
C18D1.3	6	.C[CT]TATCA.	10.5	carbohydrate binding (GATA-1)
C25E10.8	6	.C[CT]TATCA.	10.5	carbohydrate binding (GATA-1)
C28C12.5	6	.C[CT]TATCA.	10.5	carbohydrate binding (GATA-1)
C32E12.1	6	.C[CT]TATCA.	10.5	carbohydrate binding (GATA-1)
C32H11.1	6	.C[CT]TATCA.	10.5	carbohydrate binding (GATA-1)
C41G7.6	6	.C[CT]TATCA.	10.5	carbohydrate binding (GATA-1)
C45G7.3	6	.C[CT]TATCA.	10.5	carbohydrate binding (GATA-1)
C47A4.5	6	.C[CT]TATCA.	10.5	carbohydrate binding (GATA-1)
C49C3.3	6	.C[CT]TATCA.	10.5	carbohydrate binding (GATA-1)
C49G7.4	6	.C[CT]TATCA.	10.5	carbohydrate binding (GATA-1)
C50F7.5	6	.C[CT]TATCA.	10.5	carbohydrate binding (GATA-1)
F11C7.5	6	.C[CT]TATCA.	10.5	carbohydrate binding (GATA-1)
F15G9.1	6	.C[CT]TATCA.	10.5	carbohydrate binding (GATA-1)
F19H8.4	6	.C[CT]TATCA.	10.5	carbohydrate binding (GATA-1)
F34H10.1	6	.C[CT]TATCA.	10.5	carbohydrate binding (GATA-1)
F40H3.2	6	.C[CT]TATCA.	10.5	carbohydrate binding (GATA-1)
F49E11.10	6	.C[CT]TATCA.	10.5	carbohydrate binding (GATA-1)
F49E2.5	6	.C[CT]TATCA.	10.5	carbohydrate binding (GATA-1)
F53A9.8	6	.C[CT]TATCA.	10.5	carbohydrate binding (GATA-1)
F53B3.6	6	.C[CT]TATCA.	10.5	carbohydrate binding (GATA-1)
F55F3.2	6	.C[CT]TATCA.	10.5	carbohydrate binding (GATA-1)
H20E11.3	6	.C[CT]TATCA.	10.5	carbohydrate binding (GATA-1)
H34I24.2	6	.C[CT]TATCA.	10.5	carbohydrate binding (GATA-1)
K02C4.5	6	.C[CT]TATCA.	10.5	carbohydrate binding (GATA-1)
K06G5.1	6	.C[CT]TATCA.	10.5	carbohydrate binding (GATA-1)
K08D8.5	6	.C[CT]TATCA.	10.5	carbohydrate binding (GATA-1)
K09E2.3	6	.C[CT]TATCA.	10.5	carbohydrate binding (GATA-1)
LLC1.2	6	.C[CT]TATCA.	10.5	carbohydrate binding (GATA-1)
M01A8.2	6	.C[CT]TATCA.	10.5	carbohydrate binding (GATA-1)
M28.10	6	.C[CT]TATCA.	10.5	carbohydrate binding (GATA-1)
R01H10.4	6	.C[CT]TATCA.	10.5	carbohydrate binding (GATA-1)
R10E8.6	6	.C[CT]TATCA.	10.5	carbohydrate binding (GATA-1)
T01C8.3	6	.C[CT]TATCA.	10.5	carbohydrate binding (GATA-1)
T27F6.8	6	.C[CT]TATCA.	10.5	carbohydrate binding (GATA-1)
W03D2.7	6	.C[CT]TATCA.	10.5	carbohydrate binding (GATA-1)
W09D6.5	6	.C[CT]TATCA.	10.5	carbohydrate binding (GATA-1)
W09G12.7	6	.C[CT]TATCA.	10.5	carbohydrate binding (GATA-1)
Y19D10A.9	6	.C[CT]TATCA.	10.5	carbohydrate binding (GATA-1)
Y41D4B.17	6	.C[CT]TATCA.	10.5	carbohydrate binding (GATA-1)
Y43F4A.3	6	.C[CT]TATCA.	10.5	carbohydrate binding (GATA-1)
Y46D2A.1	6	.C[CT]TATCA.	10.5	carbohydrate binding (GATA-1)
Y46H3B.2	6	.C[CT]TATCA.	10.5	carbohydrate binding (GATA-1)
Y53H1B.2	6	.C[CT]TATCA.	10.5	carbohydrate binding (GATA-1)
ZK1055.7	6	.C[CT]TATCA.	10.5	carbohydrate binding (GATA-1)
ZK520.2	6	.C[CT]TATCA.	10.5	carbohydrate binding (GATA-1)
ZK6.11	6	.C[CT]TATCA.	10.5	carbohydrate binding (GATA-1)
ZK673.1	6	.C[CT]TATCA.	10.5	carbohydrate binding (GATA-1)
ZK896.6	6	.C[CT]TATCA.	10.5	carbohydrate binding (GATA-1)
ZK945.1	6	.C[CT]TATCA.	10.5	carbohydrate binding (GATA-1)
C03F11.4	9	.C[CT]TATCA.	13.6	carbohydrate binding (GATA-1)
C03G6.17	9	.C[CT]TATCA.	13.6	carbohydrate binding (GATA-1)
C05D12.2	9	.C[CT]TATCA.	13.6	carbohydrate binding (GATA-1)
C10G8.8	9	.C[CT]TATCA.	13.6	carbohydrate binding (GATA-1)
C18H9.6	9	.C[CT]TATCA.	13.6	carbohydrate binding (GATA-1)
C32D5.6	9	.C[CT]TATCA.	13.6	carbohydrate binding (GATA-1)
C42D4.1	9	.C[CT]TATCA.	13.6	carbohydrate binding (GATA-1)
C49A9.2	9	.C[CT]TATCA.	13.6	carbohydrate binding (GATA-1)
C49A9.4	9	.C[CT]TATCA.	13.6	carbohydrate binding (GATA-1)
C49A9.5	9	.C[CT]TATCA.	13.6	carbohydrate binding (GATA-1)
C49C3.4	9	.C[CT]TATCA.	13.6	carbohydrate binding (GATA-1)
C53B7.3	9	.C[CT]TATCA.	13.6	carbohydrate binding (GATA-1)
D1007.14	9	.C[CT]TATCA.	13.6	carbohydrate binding (GATA-1)
D1053.3	9	.C[CT]TATCA.	13.6	carbohydrate binding (GATA-1)
D2024.2	9	.C[CT]TATCA.	13.6	carbohydrate binding (GATA-1)
F09G8.8	9	.C[CT]TATCA.	13.6	carbohydrate binding (GATA-1)
F16G10.15	9	.C[CT]TATCA.	13.6	carbohydrate binding (GATA-1)
F18G5.6	9	.C[CT]TATCA.	13.6	carbohydrate binding (GATA-1)
F25B5.1	9	.C[CT]TATCA.	13.6	carbohydrate binding (GATA-1)
F31D4.4	9	.C[CT]TATCA.	13.6	carbohydrate binding (GATA-1)
F35E12.9	9	.C[CT]TATCA.	13.6	carbohydrate binding (GATA-1)
F36H5.2	9	.C[CT]TATCA.	13.6	carbohydrate binding (GATA-1)
F38A6.2	9	.C[CT]TATCA.	13.6	carbohydrate binding (GATA-1)
F41G4.1	9	.C[CT]TATCA.	13.6	carbohydrate binding (GATA-1)
F42G2.2	9	.C[CT]TATCA.	13.6	carbohydrate binding (GATA-1)
F52G2.3	9	.C[CT]TATCA.	13.6	carbohydrate binding (GATA-1)
F58F9.3	9	.C[CT]TATCA.	13.6	carbohydrate binding (GATA-1)
F58F9.4	9	.C[CT]TATCA.	13.6	carbohydrate binding (GATA-1)
H06H21.8	9	.C[CT]TATCA.	13.6	carbohydrate binding (GATA-1)
H22K11.4	9	.C[CT]TATCA.	13.6	carbohydrate binding (GATA-1)
K03B8.8	9	.C[CT]TATCA.	13.6	carbohydrate binding (GATA-1)
K08D8.3	9	.C[CT]TATCA.	13.6	carbohydrate binding (GATA-1)
M01F1.5	9	.C[CT]TATCA.	13.6	carbohydrate binding (GATA-1)
R05D3.9	9	.C[CT]TATCA.	13.6	carbohydrate binding (GATA-1)
R07H5.11	9	.C[CT]TATCA.	13.6	carbohydrate binding (GATA-1)
R52.3	9	.C[CT]TATCA.	13.6	carbohydrate binding (GATA-1)
T01E8.1	9	.C[CT]TATCA.	13.6	carbohydrate binding (GATA-1)
T14F9.3	9	.C[CT]TATCA.	13.6	carbohydrate binding (GATA-1)
T16G1.6	9	.C[CT]TATCA.	13.6	carbohydrate binding (GATA-1)
VC5.2	9	.C[CT]TATCA.	13.6	carbohydrate binding (GATA-1)
Y47G6A.30	9	.C[CT]TATCA.	13.6	carbohydrate binding (GATA-1)
Y60A3A.8	9	.C[CT]TATCA.	13.6	carbohydrate binding (GATA-1)
Y75B8A.28	9	.C[CT]TATCA.	13.6	carbohydrate binding (GATA-1)
Y75B8A.29	9	.C[CT]TATCA.	13.6	carbohydrate binding (GATA-1)
Y75B8A.3	9	.C[CT]TATCA.	13.6	carbohydrate binding (GATA-1)
ZC412.4	9	.C[CT]TATCA.	13.6	carbohydrate binding (GATA-1)
ZK455.8	9	.C[CT]TATCA.	13.6	carbohydrate binding (GATA-1)
ZK822.4	9	.C[CT]TATCA.	13.6	carbohydrate binding (GATA-1)
B0228.1	1	[CT]AG[GT][CT]AG[AGT][CGT]	5.5	cuticle
B0379.1	1	[CT]AG[GT][CT]AG[AGT][CGT]	5.5	cuticle
C04A11.5	1	[CT]AG[GT][CT]AG[AGT][CGT]	5.5	cuticle
C06E4.2	1	[CT]AG[GT][CT]AG[AGT][CGT]	5.5	cuticle
C07B5.3	1	[CT]AG[GT][CT]AG[AGT][CGT]	5.5	cuticle
C18B2.3	1	[CT]AG[GT][CT]AG[AGT][CGT]	5.5	cuticle
C31H2.3	1	[CT]AG[GT][CT]AG[AGT][CGT]	5.5	cuticle
C45E5.4	1	[CT]AG[GT][CT]AG[AGT][CGT]	5.5	cuticle
C47E12.9	1	[CT]AG[GT][CT]AG[AGT][CGT]	5.5	cuticle
C49C3.12	1	[CT]AG[GT][CT]AG[AGT][CGT]	5.5	cuticle
E02C12.4	1	[CT]AG[GT][CT]AG[AGT][CGT]	5.5	cuticle
F02D8.2	1	[CT]AG[GT][CT]AG[AGT][CGT]	5.5	cuticle
F09B9.4	1	[CT]AG[GT][CT]AG[AGT][CGT]	5.5	cuticle
F19H8.2	1	[CT]AG[GT][CT]AG[AGT][CGT]	5.5	cuticle
F22F4.4	1	[CT]AG[GT][CT]AG[AGT][CGT]	5.5	cuticle
F23H12.8	1	[CT]AG[GT][CT]AG[AGT][CGT]	5.5	cuticle
F25H8.6	1	[CT]AG[GT][CT]AG[AGT][CGT]	5.5	cuticle
F26G1.5	1	[CT]AG[GT][CT]AG[AGT][CGT]	5.5	cuticle
F31D4.8	1	[CT]AG[GT][CT]AG[AGT][CGT]	5.5	cuticle
F33C8.4	1	[CT]AG[GT][CT]AG[AGT][CGT]	5.5	cuticle
F35E12.5	1	[CT]AG[GT][CT]AG[AGT][CGT]	5.5	cuticle
F35E8.8	1	[CT]AG[GT][CT]AG[AGT][CGT]	5.5	cuticle
F38C2.1	1	[CT]AG[GT][CT]AG[AGT][CGT]	5.5	cuticle
F46C5.10	1	[CT]AG[GT][CT]AG[AGT][CGT]	5.5	cuticle
F53A9.9	1	[CT]AG[GT][CT]AG[AGT][CGT]	5.5	cuticle
F55C10.5	1	[CT]AG[GT][CT]AG[AGT][CGT]	5.5	cuticle
F58G6.4	1	[CT]AG[GT][CT]AG[AGT][CGT]	5.5	cuticle
F59A7.2	1	[CT]AG[GT][CT]AG[AGT][CGT]	5.5	cuticle
K02F3.3	1	[CT]AG[GT][CT]AG[AGT][CGT]	5.5	cuticle
K08C7.4	1	[CT]AG[GT][CT]AG[AGT][CGT]	5.5	cuticle
K09B3.1	1	[CT]AG[GT][CT]AG[AGT][CGT]	5.5	cuticle
K10H10.10	1	[CT]AG[GT][CT]AG[AGT][CGT]	5.5	cuticle
M05D6.9	1	[CT]AG[GT][CT]AG[AGT][CGT]	5.5	cuticle
R03D7.6	1	[CT]AG[GT][CT]AG[AGT][CGT]	5.5	cuticle
R05H10.1	1	[CT]AG[GT][CT]AG[AGT][CGT]	5.5	cuticle
R06F6.11	1	[CT]AG[GT][CT]AG[AGT][CGT]	5.5	cuticle
R09A1.5	1	[CT]AG[GT][CT]AG[AGT][CGT]	5.5	cuticle
R12E2.6	1	[CT]AG[GT][CT]AG[AGT][CGT]	5.5	cuticle
R148.6	1	[CT]AG[GT][CT]AG[AGT][CGT]	5.5	cuticle
T03D8.4	1	[CT]AG[GT][CT]AG[AGT][CGT]	5.5	cuticle
T04A8.13	1	[CT]AG[GT][CT]AG[AGT][CGT]	5.5	cuticle
T05C1.2	1	[CT]AG[GT][CT]AG[AGT][CGT]	5.5	cuticle
T11B7.5	1	[CT]AG[GT][CT]AG[AGT][CGT]	5.5	cuticle
T22C1.2	1	[CT]AG[GT][CT]AG[AGT][CGT]	5.5	cuticle
T24F1.5	1	[CT]AG[GT][CT]AG[AGT][CGT]	5.5	cuticle
W08E12.8	1	[CT]AG[GT][CT]AG[AGT][CGT]	5.5	cuticle
Y102A5C.19	1	[CT]AG[GT][CT]AG[AGT][CGT]	5.5	cuticle
Y38H6C.5	1	[CT]AG[GT][CT]AG[AGT][CGT]	5.5	cuticle
Y55F3AM.8	1	[CT]AG[GT][CT]AG[AGT][CGT]	5.5	cuticle
Y57G7A.11	1	[CT]AG[GT][CT]AG[AGT][CGT]	5.5	cuticle
Y69H2.10	1	[CT]AG[GT][CT]AG[AGT][CGT]	5.5	cuticle
Y72A10A.1	1	[CT]AG[GT][CT]AG[AGT][CGT]	5.5	cuticle
ZK546.17	1	[CT]AG[GT][CT]AG[AGT][CGT]	5.5	cuticle
C29F5.1	11	[CT]AG[GT][CT]AG[AGT][CGT]	6.1	cuticle
F08D12.2	11	[CT]AG[GT][CT]AG[AGT][CGT]	6.1	cuticle
F55G11.4	11	[CT]AG[GT][CT]AG[AGT][CGT]	6.1	cuticle
F55H12.4	11	[CT]AG[GT][CT]AG[AGT][CGT]	6.1	cuticle
K11H12.4	11	[CT]AG[GT][CT]AG[AGT][CGT]	6.1	cuticle
R10E8.1	11	[CT]AG[GT][CT]AG[AGT][CGT]	6.1	cuticle
R13D7.2	11	[CT]AG[GT][CT]AG[AGT][CGT]	6.1	cuticle
T13C2.2	11	[CT]AG[GT][CT]AG[AGT][CGT]	6.1	cuticle
T28H10.2	11	[CT]AG[GT][CT]AG[AGT][CGT]	6.1	cuticle
W05F2.4	11	[CT]AG[GT][CT]AG[AGT][CGT]	6.1	cuticle
W07B8.3	11	[CT]AG[GT][CT]AG[AGT][CGT]	6.1	cuticle
Y102A11A.9	11	[CT]AG[GT][CT]AG[AGT][CGT]	6.1	cuticle
Y46D2A.2	11	[CT]AG[GT][CT]AG[AGT][CGT]	6.1	cuticle
Y53F4B.23	11	[CT]AG[GT][CT]AG[AGT][CGT]	6.1	cuticle
Y58G8A.1	11	[CT]AG[GT][CT]AG[AGT][CGT]	6.1	cuticle
Y59E9AL.5	11	[CT]AG[GT][CT]AG[AGT][CGT]	6.1	cuticle
ZK20.1	11	[CT]AG[GT][CT]AG[AGT][CGT]	6.1	cuticle
C06E1.9	2	.A.CGGAG[ACT]	7.3	helicase activity
C35B1.2	2	.A.CGGAG[ACT]	7.3	helicase activity
C49H3.6	2	.A.CGGAG[ACT]	7.3	helicase activity
F09G2.4	2	.A.CGGAG[ACT]	7.3	helicase activity
F10B5.7	2	.A.CGGAG[ACT]	7.3	helicase activity
F10F2.1	2	.A.CGGAG[ACT]	7.3	helicase activity
F28C1.1	2	.A.CGGAG[ACT]	7.3	helicase activity
F33G12.4	2	.A.CGGAG[ACT]	7.3	helicase activity
K04F10.7	2	.A.CGGAG[ACT]	7.3	helicase activity
M05D6.2	2	.A.CGGAG[ACT]	7.3	helicase activity
T22C1.6	2	.A.CGGAG[ACT]	7.3	helicase activity
T24F1.1	2	.A.CGGAG[ACT]	7.3	helicase activity
W02F12.4	2	.A.CGGAG[ACT]	7.3	helicase activity
W06E11.4	2	.A.CGGAG[ACT]	7.3	helicase activity
Y48B6A.3	2	.A.CGGAG[ACT]	7.3	helicase activity
Y48E1C.2	2	.A.CGGAG[ACT]	7.3	helicase activity
Y54E2A.2	2	.A.CGGAG[ACT]	7.3	helicase activity
Y59C2A.3	2	.A.CGGAG[ACT]	7.3	helicase activity
ZK1058.4	2	.A.CGGAG[ACT]	7.3	helicase activity
ZK856.9	2	.A.CGGAG[ACT]	7.3	helicase activity
ZK945.3	2	.A.CGGAG[ACT]	7.3	helicase activity
C25E10.10	12	[ACG][AG]CTTA[GT]A.	5	ion transport
C36C5.5	12	[ACG][AG]CTTA[GT]A.	5	ion transport
C38C3.8	12	[ACG][AG]CTTA[GT]A.	5	ion transport
C38C6.3	12	[ACG][AG]CTTA[GT]A.	5	ion transport
C46H11.8	12	[ACG][AG]CTTA[GT]A.	5	ion transport
C49G7.10	12	[ACG][AG]CTTA[GT]A.	5	ion transport
C52G5.2	12	[ACG][AG]CTTA[GT]A.	5	ion transport
C54G7.3	12	[ACG][AG]CTTA[GT]A.	5	ion transport
D2024.4	12	[ACG][AG]CTTA[GT]A.	5	ion transport
D2096.6	12	[ACG][AG]CTTA[GT]A.	5	ion transport
F09F9.2	12	[ACG][AG]CTTA[GT]A.	5	ion transport
F10F2.3	12	[ACG][AG]CTTA[GT]A.	5	ion transport
F15E6.2	12	[ACG][AG]CTTA[GT]A.	5	ion transport
F21C10.11	12	[ACG][AG]CTTA[GT]A.	5	ion transport
F32E10.3	12	[ACG][AG]CTTA[GT]A.	5	ion transport
F35F10.13	12	[ACG][AG]CTTA[GT]A.	5	ion transport
F40E10.5	12	[ACG][AG]CTTA[GT]A.	5	ion transport
F41G3.3	12	[ACG][AG]CTTA[GT]A.	5	ion transport
F46C8.8	12	[ACG][AG]CTTA[GT]A.	5	ion transport
F52C6.7	12	[ACG][AG]CTTA[GT]A.	5	ion transport
H03E18.1	12	[ACG][AG]CTTA[GT]A.	5	ion transport
K03H1.4	12	[ACG][AG]CTTA[GT]A.	5	ion transport
K08E7.5	12	[ACG][AG]CTTA[GT]A.	5	ion transport
K09E4.6	12	[ACG][AG]CTTA[GT]A.	5	ion transport
M03B6.3	12	[ACG][AG]CTTA[GT]A.	5	ion transport
R07E3.6	12	[ACG][AG]CTTA[GT]A.	5	ion transport
R11F4.3	12	[ACG][AG]CTTA[GT]A.	5	ion transport
T06G6.12	12	[ACG][AG]CTTA[GT]A.	5	ion transport
T16G1.2	12	[ACG][AG]CTTA[GT]A.	5	ion transport
T18H9.1	12	[ACG][AG]CTTA[GT]A.	5	ion transport
Y47D7A.13	12	[ACG][AG]CTTA[GT]A.	5	ion transport
Y47D7A.15	12	[ACG][AG]CTTA[GT]A.	5	ion transport
Y47D7A.5	12	[ACG][AG]CTTA[GT]A.	5	ion transport
Y74E4A.1	12	[ACG][AG]CTTA[GT]A.	5	ion transport
ZK662.2	12	[ACG][AG]CTTA[GT]A.	5	ion transport
C02E7.7	12	[ACT]TT[GT]ATAC.	12.1	ion transport
C02F4.4	12	[ACT]TT[GT]ATAC.	12.1	ion transport
C06C3.5	12	[ACT]TT[GT]ATAC.	12.1	ion transport
C09E8.2	12	[ACT]TT[GT]ATAC.	12.1	ion transport
C14C11.8	12	[ACT]TT[GT]ATAC.	12.1	ion transport
C14F5.2	12	[ACT]TT[GT]ATAC.	12.1	ion transport
C29F3.5	12	[ACT]TT[GT]ATAC.	12.1	ion transport
C42D4.3	12	[ACT]TT[GT]ATAC.	12.1	ion transport
C49F5.7	12	[ACT]TT[GT]ATAC.	12.1	ion transport
C50H2.12	12	[ACT]TT[GT]ATAC.	12.1	ion transport
C56C10.4	12	[ACT]TT[GT]ATAC.	12.1	ion transport
D2092.8	12	[ACT]TT[GT]ATAC.	12.1	ion transport
F08B12.4	12	[ACT]TT[GT]ATAC.	12.1	ion transport
F16B4.4	12	[ACT]TT[GT]ATAC.	12.1	ion transport
F28D1.5	12	[ACT]TT[GT]ATAC.	12.1	ion transport
F33A8.10	12	[ACT]TT[GT]ATAC.	12.1	ion transport
F33D4.6	12	[ACT]TT[GT]ATAC.	12.1	ion transport
F41E6.11	12	[ACT]TT[GT]ATAC.	12.1	ion transport
F41F3.3	12	[ACT]TT[GT]ATAC.	12.1	ion transport
F43G6.11	12	[ACT]TT[GT]ATAC.	12.1	ion transport
F44E2.4	12	[ACT]TT[GT]ATAC.	12.1	ion transport
F48D6.4	12	[ACT]TT[GT]ATAC.	12.1	ion transport
F49E10.2	12	[ACT]TT[GT]ATAC.	12.1	ion transport
F58G1.5	12	[ACT]TT[GT]ATAC.	12.1	ion transport
H36L18.2	12	[ACT]TT[GT]ATAC.	12.1	ion transport
H42K12.3	12	[ACT]TT[GT]ATAC.	12.1	ion transport
JC8.8	12	[ACT]TT[GT]ATAC.	12.1	ion transport
K01D12.9	12	[ACT]TT[GT]ATAC.	12.1	ion transport
R02F11.1	12	[ACT]TT[GT]ATAC.	12.1	ion transport
R07E3.2	12	[ACT]TT[GT]ATAC.	12.1	ion transport
R12E2.15	12	[ACT]TT[GT]ATAC.	12.1	ion transport
T01B10.2	12	[ACT]TT[GT]ATAC.	12.1	ion transport
T02E9.2	12	[ACT]TT[GT]ATAC.	12.1	ion transport
T04H1.6	12	[ACT]TT[GT]ATAC.	12.1	ion transport
T13F3.6	12	[ACT]TT[GT]ATAC.	12.1	ion transport
T23F1.6	12	[ACT]TT[GT]ATAC.	12.1	ion transport
T25E4.1	12	[ACT]TT[GT]ATAC.	12.1	ion transport
W04G3.3	12	[ACT]TT[GT]ATAC.	12.1	ion transport
Y105C5B.5	12	[ACT]TT[GT]ATAC.	12.1	ion transport
Y106G6D.8	12	[ACT]TT[GT]ATAC.	12.1	ion transport
Y17G7B.1	12	[ACT]TT[GT]ATAC.	12.1	ion transport
Y37H2A.11	12	[ACT]TT[GT]ATAC.	12.1	ion transport
ZC168.5	12	[ACT]TT[GT]ATAC.	12.1	ion transport
B0034.1	11	[CGT][ACG]A[CT]AGTA[AGT]	5.6	ion transport
C03B1.7	11	[CGT][ACG]A[CT]AGTA[AGT]	5.6	ion transport
C05D10.4	11	[CGT][ACG]A[CT]AGTA[AGT]	5.6	ion transport
D1044.7	11	[CGT][ACG]A[CT]AGTA[AGT]	5.6	ion transport
F09F3.6	11	[CGT][ACG]A[CT]AGTA[AGT]	5.6	ion transport
F47G4.3	11	[CGT][ACG]A[CT]AGTA[AGT]	5.6	ion transport
M04C3.3	11	[CGT][ACG]A[CT]AGTA[AGT]	5.6	ion transport
T07F10.4	11	[CGT][ACG]A[CT]AGTA[AGT]	5.6	ion transport
T16G1.5	11	[CGT][ACG]A[CT]AGTA[AGT]	5.6	ion transport
T18D3.8	11	[CGT][ACG]A[CT]AGTA[AGT]	5.6	ion transport
T20B5.2	11	[CGT][ACG]A[CT]AGTA[AGT]	5.6	ion transport
W01F3.1	11	[CGT][ACG]A[CT]AGTA[AGT]	5.6	ion transport
Y105E8A.12	11	[CGT][ACG]A[CT]AGTA[AGT]	5.6	ion transport
Y17G7B.11	11	[CGT][ACG]A[CT]AGTA[AGT]	5.6	ion transport
Y47D7A.7	11	[CGT][ACG]A[CT]AGTA[AGT]	5.6	ion transport
Y55H10A.1	11	[CGT][ACG]A[CT]AGTA[AGT]	5.6	ion transport
ZK792.4	11	[CGT][ACG]A[CT]AGTA[AGT]	5.6	ion transport
C05E11.8	1	[ACT]TT[GT]ATAC.	5.4	ion transport (TATA)
C14C10.7	1	[ACT]TT[GT]ATAC.	5.4	ion transport (TATA)
C54E4.5	1	[ACT]TT[GT]ATAC.	5.4	ion transport (TATA)
F13B6.1	1	[ACT]TT[GT]ATAC.	5.4	ion transport (TATA)
F19F10.3	1	[ACT]TT[GT]ATAC.	5.4	ion transport (TATA)
F35E8.9	1	[ACT]TT[GT]ATAC.	5.4	ion transport (TATA)
F43H9.4	1	[ACT]TT[GT]ATAC.	5.4	ion transport (TATA)
F45E4.5	1	[ACT]TT[GT]ATAC.	5.4	ion transport (TATA)
F52E4.5	1	[ACT]TT[GT]ATAC.	5.4	ion transport (TATA)
K08C7.7	1	[ACT]TT[GT]ATAC.	5.4	ion transport (TATA)
R13D7.7	1	[ACT]TT[GT]ATAC.	5.4	ion transport (TATA)
T24H10.7	1	[ACT]TT[GT]ATAC.	5.4	ion transport (TATA)
T26C5.1	1	[ACT]TT[GT]ATAC.	5.4	ion transport (TATA)
W03G1.5	1	[ACT]TT[GT]ATAC.	5.4	ion transport (TATA)
Y38H6C.23	1	[ACT]TT[GT]ATAC.	5.4	ion transport (TATA)
Y39G8B.9	1	[ACT]TT[GT]ATAC.	5.4	ion transport (TATA)
Y43F8C.1	1	[ACT]TT[GT]ATAC.	5.4	ion transport (TATA)
Y57G7A.9	1	[ACT]TT[GT]ATAC.	5.4	ion transport (TATA)
Y67A10A.10	1	[ACT]TT[GT]ATAC.	5.4	ion transport (TATA)
Y75B8A.20	1	[ACT]TT[GT]ATAC.	5.4	ion transport (TATA)
ZC47.6	1	[ACT]TT[GT]ATAC.	5.4	ion transport (TATA)
C05E7.2	12	.TCAT[AT]AC.	4.7	ion transport/cuticle component
D1054.9	12	.TCAT[AT]AC.	4.7	ion transport/cuticle component
F53F1.5	12	.TCAT[AT]AC.	4.7	ion transport/cuticle component
T03G6.1	12	.TCAT[AT]AC.	4.7	ion transport/cuticle component
T16G1.1	12	.TCAT[AT]AC.	4.7	ion transport/cuticle component
T27A10.6	12	.TCAT[AT]AC.	4.7	ion transport/cuticle component
C25D7.15	1	.TCAT[AT]AC.	5.8	ion transport/cuticle component
C33G8.4	1	.TCAT[AT]AC.	5.8	ion transport/cuticle component
E01A2.8	1	.TCAT[AT]AC.	5.8	ion transport/cuticle component
F28F5.6	1	.TCAT[AT]AC.	5.8	ion transport/cuticle component
F40F8.4	1	.TCAT[AT]AC.	5.8	ion transport/cuticle component
F43C1.5	1	.TCAT[AT]AC.	5.8	ion transport/cuticle component
F53C3.8	1	.TCAT[AT]AC.	5.8	ion transport/cuticle component	TATA
F55A11.6	1	.TCAT[AT]AC.	5.8	ion transport/cuticle component	TATA
K02D3.2	1	.TCAT[AT]AC.	5.8	ion transport/cuticle component	TATA
R07E5.4	1	.TCAT[AT]AC.	5.8	ion transport/cuticle component	TATA
T01B4.3	1	.TCAT[AT]AC.	5.8	ion transport/cuticle component	TATA
T02E1.8	1	.TCAT[AT]AC.	5.8	ion transport/cuticle component	TATA
T04B2.3	1	.TCAT[AT]AC.	5.8	ion transport/cuticle component	TATA
T09F5.11	1	.TCAT[AT]AC.	5.8	ion transport/cuticle component	TATA
T23H2.4	1	.TCAT[AT]AC.	5.8	ion transport/cuticle component	TATA
T24E12.10	1	.TCAT[AT]AC.	5.8	ion transport/cuticle component	TATA
W06B11.1	1	.TCAT[AT]AC.	5.8	ion transport/cuticle component	TATA
Y37D8A.3	1	.TCAT[AT]AC.	5.8	ion transport/cuticle component	TATA
Y55F3AM.10	1	.TCAT[AT]AC.	5.8	ion transport/cuticle component	TATA
Y5F2A.1	1	.TCAT[AT]AC.	5.8	ion transport/cuticle component	TATA
Y69E1A.5	1	.TCAT[AT]AC.	5.8	ion transport/cuticle component	TATA
Y82E9BL.13	1	.TCAT[AT]AC.	5.8	ion transport/cuticle component	TATA
C52E2.4	11	.TCAT[AT]AC.	4.5	ion transport/cuticle component	TATA
ZK328.6	11	.TCAT[AT]AC.	4.5	ion transport/cuticle component	TATA
C39E9.4	11	.TCAT[AT]AC.	5.9	ion transport/cuticle component	TATA
F08G5.7	11	.TCAT[AT]AC.	5.9	ion transport/cuticle component	TATA
F21A3.3	11	.TCAT[AT]AC.	5.9	ion transport/cuticle component	TATA
F39E9.1	11	.TCAT[AT]AC.	5.9	ion transport/cuticle component	TATA
K10D11.3	11	.TCAT[AT]AC.	5.9	ion transport/cuticle component	TATA
W05E7.3	11	.TCAT[AT]AC.	5.9	ion transport/cuticle component	TATA
Y46H3D.8	11	.TCAT[AT]AC.	5.9	ion transport/cuticle component	TATA
Y6B3B.10	11	.TCAT[AT]AC.	5.9	ion transport/cuticle component	TATA
ZC15.8	11	.TCAT[AT]AC.	5.9	ion transport/cuticle component	TATA
ZC455.1	11	.TCAT[AT]AC.	5.9	ion transport/cuticle component	TATA
AC8.4	8	.TTTTGAC[ACT]	5.5	membrane part	TATA
C02F5.7	8	.TTTTGAC[ACT]	5.5	membrane part	TATA
C34E11.3	8	.TTTTGAC[ACT]	5.5	membrane part	TATA
F11A5.6	8	.TTTTGAC[ACT]	5.5	membrane part	TATA
F46F6.4	8	.TTTTGAC[ACT]	5.5	membrane part	TATA
F47A4.3	8	.TTTTGAC[ACT]	5.5	membrane part	TATA
F58A3.3	8	.TTTTGAC[ACT]	5.5	membrane part	TATA
F58E2.4	8	.TTTTGAC[ACT]	5.5	membrane part	TATA
K04F10.2	8	.TTTTGAC[ACT]	5.5	membrane part	TATA
T07E3.4	8	.TTTTGAC[ACT]	5.5	membrane part	TATA
T16H12.9	8	.TTTTGAC[ACT]	5.5	membrane part	TATA
T28B8.5	8	.TTTTGAC[ACT]	5.5	membrane part	TATA
T28C12.4	8	.TTTTGAC[ACT]	5.5	membrane part	TATA
W01A11.7	8	.TTTTGAC[ACT]	5.5	membrane part	TATA
Y15E3A.2	8	.TTTTGAC[ACT]	5.5	membrane part	TATA
Y53F4B.4	8	.TTTTGAC[ACT]	5.5	membrane part
AH10.4	1	[AT]AAG[AGT]TCA.	6.9	membrane part (HNF-4)
C04E12.2	1	[AT]AAG[AGT]TCA.	6.9	membrane part (HNF-4)
C04G2.1	1	[AT]AAG[AGT]TCA.	6.9	membrane part (HNF-4)
C05D11.5	1	[AT]AAG[AGT]TCA.	6.9	membrane part (HNF-4)
C05D9.9	1	[AT]AAG[AGT]TCA.	6.9	membrane part (HNF-4)
C06A12.3	1	[AT]AAG[AGT]TCA.	6.9	membrane part (HNF-4)
C06E4.7	1	[AT]AAG[AGT]TCA.	6.9	membrane part (HNF-4)
C08E3.13	1	[AT]AAG[AGT]TCA.	6.9	membrane part (HNF-4)
C12D5.10	1	[AT]AAG[AGT]TCA.	6.9	membrane part (HNF-4)
C12D5.9	1	[AT]AAG[AGT]TCA.	6.9	membrane part (HNF-4)
C17H12.6	1	[AT]AAG[AGT]TCA.	6.9	membrane part (HNF-4)
C18A11.2	1	[AT]AAG[AGT]TCA.	6.9	membrane part (HNF-4)
C29F9.2	1	[AT]AAG[AGT]TCA.	6.9	membrane part (HNF-4)
C32D5.1	1	[AT]AAG[AGT]TCA.	6.9	membrane part (HNF-4)
C39E9.8	1	[AT]AAG[AGT]TCA.	6.9	membrane part (HNF-4)
C40H1.5	1	[AT]AAG[AGT]TCA.	6.9	membrane part (HNF-4)
C46F2.1	1	[AT]AAG[AGT]TCA.	6.9	membrane part (HNF-4)
C54D10.3	1	[AT]AAG[AGT]TCA.	6.9	membrane part (HNF-4)
C56E6.5	1	[AT]AAG[AGT]TCA.	6.9	membrane part (HNF-4)
DH11.2	1	[AT]AAG[AGT]TCA.	6.9	membrane part (HNF-4)
E04F6.9	1	[AT]AAG[AGT]TCA.	6.9	membrane part (HNF-4)
F01G10.6	1	[AT]AAG[AGT]TCA.	6.9	membrane part (HNF-4)
F07C4.7	1	[AT]AAG[AGT]TCA.	6.9	membrane part (HNF-4)
F10G7.11	1	[AT]AAG[AGT]TCA.	6.9	membrane part (HNF-4)
F13G3.12	1	[AT]AAG[AGT]TCA.	6.9	membrane part (HNF-4)
F15A4.11	1	[AT]AAG[AGT]TCA.	6.9	membrane part (HNF-4)
F18A11.2	1	[AT]AAG[AGT]TCA.	6.9	membrane part (HNF-4)
F19F10.4	1	[AT]AAG[AGT]TCA.	6.9	membrane part (HNF-4)
F20A1.1	1	[AT]AAG[AGT]TCA.	6.9	membrane part (HNF-4)
F21G4.5	1	[AT]AAG[AGT]TCA.	6.9	membrane part (HNF-4)
F22A3.2	1	[AT]AAG[AGT]TCA.	6.9	membrane part (HNF-4)
F23H12.9	1	[AT]AAG[AGT]TCA.	6.9	membrane part (HNF-4)
F26G1.4	1	[AT]AAG[AGT]TCA.	6.9	membrane part (HNF-4)
F28A12.2	1	[AT]AAG[AGT]TCA.	6.9	membrane part (HNF-4)
F35C11.1	1	[AT]AAG[AGT]TCA.	6.9	membrane part (HNF-4)
F35C11.6	1	[AT]AAG[AGT]TCA.	6.9	membrane part (HNF-4)
F36F12.2	1	[AT]AAG[AGT]TCA.	6.9	membrane part (HNF-4)
F38B2.2	1	[AT]AAG[AGT]TCA.	6.9	membrane part (HNF-4)
F38E11.7	1	[AT]AAG[AGT]TCA.	6.9	membrane part (HNF-4)
F41E6.1	1	[AT]AAG[AGT]TCA.	6.9	membrane part (HNF-4)
F41E6.7	1	[AT]AAG[AGT]TCA.	6.9	membrane part (HNF-4)
F41E7.4	1	[AT]AAG[AGT]TCA.	6.9	membrane part (HNF-4)
F41E7.5	1	[AT]AAG[AGT]TCA.	6.9	membrane part (HNF-4)
F41G4.8	1	[AT]AAG[AGT]TCA.	6.9	membrane part (HNF-4)
F42F12.8	1	[AT]AAG[AGT]TCA.	6.9	membrane part (HNF-4)
F47G4.5	1	[AT]AAG[AGT]TCA.	6.9	membrane part (HNF-4)
F49E12.8	1	[AT]AAG[AGT]TCA.	6.9	membrane part (HNF-4)
F52H2.3	1	[AT]AAG[AGT]TCA.	6.9	membrane part (HNF-4)
F53F10.1	1	[AT]AAG[AGT]TCA.	6.9	membrane part (HNF-4)
F54E4.3	1	[AT]AAG[AGT]TCA.	6.9	membrane part (HNF-4)
F54E7.6	1	[AT]AAG[AGT]TCA.	6.9	membrane part (HNF-4)
F57E7.1	1	[AT]AAG[AGT]TCA.	6.9	membrane part (HNF-4)
F58H1.7	1	[AT]AAG[AGT]TCA.	6.9	membrane part (HNF-4)
F58H7.3	1	[AT]AAG[AGT]TCA.	6.9	membrane part (HNF-4)
H14N18.3	1	[AT]AAG[AGT]TCA.	6.9	membrane part (HNF-4)
H22K11.3	1	[AT]AAG[AGT]TCA.	6.9	membrane part (HNF-4)
K01F9.2	1	[AT]AAG[AGT]TCA.	6.9	membrane part (HNF-4)
K08F4.11	1	[AT]AAG[AGT]TCA.	6.9	membrane part (HNF-4)
K11H12.7	1	[AT]AAG[AGT]TCA.	6.9	membrane part (HNF-4)
M176.5	1	[AT]AAG[AGT]TCA.	6.9	membrane part (HNF-4)
M88.7	1	[AT]AAG[AGT]TCA.	6.9	membrane part (HNF-4)
PAR2.1	1	[AT]AAG[AGT]TCA.	6.9	membrane part (HNF-4)
R06B9.4	1	[AT]AAG[AGT]TCA.	6.9	membrane part (HNF-4)
R07G3.8	1	[AT]AAG[AGT]TCA.	6.9	membrane part (HNF-4)
R10E11.5	1	[AT]AAG[AGT]TCA.	6.9	membrane part (HNF-4)
R11D1.3	1	[AT]AAG[AGT]TCA.	6.9	membrane part (HNF-4)
R13A1.5	1	[AT]AAG[AGT]TCA.	6.9	membrane part (HNF-4)
T02B11.4	1	[AT]AAG[AGT]TCA.	6.9	membrane part (HNF-4)
T04C12.3	1	[AT]AAG[AGT]TCA.	6.9	membrane part (HNF-4)
T05H4.15	1	[AT]AAG[AGT]TCA.	6.9	membrane part (HNF-4)
T06E6.10	1	[AT]AAG[AGT]TCA.	6.9	membrane part (HNF-4)
T07F10.6	1	[AT]AAG[AGT]TCA.	6.9	membrane part (HNF-4)
T08A9.12	1	[AT]AAG[AGT]TCA.	6.9	membrane part (HNF-4)
T24H10.8	1	[AT]AAG[AGT]TCA.	6.9	membrane part (HNF-4)
T25C12.4	1	[AT]AAG[AGT]TCA.	6.9	membrane part (HNF-4)
T28F4.6	1	[AT]AAG[AGT]TCA.	6.9	membrane part (HNF-4)
Y105E8A.28	1	[AT]AAG[AGT]TCA.	6.9	membrane part (HNF-4)
Y111B2A.8	1	[AT]AAG[AGT]TCA.	6.9	membrane part (HNF-4)
Y113G7B.1	1	[AT]AAG[AGT]TCA.	6.9	membrane part (HNF-4)
Y113G7B.3	1	[AT]AAG[AGT]TCA.	6.9	membrane part (HNF-4)
Y1H11.2	1	[AT]AAG[AGT]TCA.	6.9	membrane part (HNF-4)
Y39B6A.34	1	[AT]AAG[AGT]TCA.	6.9	membrane part (HNF-4)
Y41E3.6	1	[AT]AAG[AGT]TCA.	6.9	membrane part (HNF-4)
Y47D3A.2	1	[AT]AAG[AGT]TCA.	6.9	membrane part (HNF-4)
Y47H10A.4	1	[AT]AAG[AGT]TCA.	6.9	membrane part (HNF-4)
Y53F4B.31	1	[AT]AAG[AGT]TCA.	6.9	membrane part (HNF-4)
Y53F4B.33	1	[AT]AAG[AGT]TCA.	6.9	membrane part (HNF-4)
Y55D5A.4	1	[AT]AAG[AGT]TCA.	6.9	membrane part (HNF-4)
Y67D8C.8	1	[AT]AAG[AGT]TCA.	6.9	membrane part (HNF-4)
Y71F9B.13	1	[AT]AAG[AGT]TCA.	6.9	membrane part (HNF-4)
Y73F8A.26	1	[AT]AAG[AGT]TCA.	6.9	membrane part (HNF-4)
Y77E11A.14	1	[AT]AAG[AGT]TCA.	6.9	membrane part (HNF-4)
Y82E9BL.8	1	[AT]AAG[AGT]TCA.	6.9	membrane part (HNF-4)
ZC15.7	1	[AT]AAG[AGT]TCA.	6.9	membrane part (HNF-4)
ZK643.1	1	[AT]AAG[AGT]TCA.	6.9	membrane part (HNF-4)
ZK856.6	1	[AT]AAG[AGT]TCA.	6.9	membrane part (HNF-4)
ZK994.6	1	[AT]AAG[AGT]TCA.	6.9	membrane part (HNF-4)
T13A10.5	11	[AT]AAG[AGT]TCA.	4.6	membrane part (HNF-4)
T25G12.3	11	[AT]AAG[AGT]TCA.	4.6	membrane part (HNF-4)
Y71H2B.7	11	[AT]AAG[AGT]TCA.	4.6	membrane part (HNF-4)
C02F12.3	1	.TTTCAAA.	5	membrane part/signal transduction
C04C3.2	1	.TTTCAAA.	5	membrane part/signal transduction
C06H2.4	1	.TTTCAAA.	5	membrane part/signal transduction
C12D8.16	1	.TTTCAAA.	5	membrane part/signal transduction
C16C10.11	1	.TTTCAAA.	5	membrane part/signal transduction
C25D7.4	1	.TTTCAAA.	5	membrane part/signal transduction
C26D10.6	1	.TTTCAAA.	5	membrane part/signal transduction
C29F5.7	1	.TTTCAAA.	5	membrane part/signal transduction
C33A12.4	1	.TTTCAAA.	5	membrane part/signal transduction
C35D10.17	1	.TTTCAAA.	5	membrane part/signal transduction
C45G9.12	1	.TTTCAAA.	5	membrane part/signal transduction
C51E3.9	1	.TTTCAAA.	5	membrane part/signal transduction
C52D10.1	1	.TTTCAAA.	5	membrane part/signal transduction
C53C7.3	1	.TTTCAAA.	5	membrane part/signal transduction
D1025.8	1	.TTTCAAA.	5	membrane part/signal transduction
F07C6.3	1	.TTTCAAA.	5	membrane part/signal transduction
F13H10.1	1	.TTTCAAA.	5	membrane part/signal transduction
F13H8.4	1	.TTTCAAA.	5	membrane part/signal transduction
F16B4.2	1	.TTTCAAA.	5	membrane part/signal transduction
F23D12.6	1	.TTTCAAA.	5	membrane part/signal transduction
F23F1.7	1	.TTTCAAA.	5	membrane part/signal transduction
F27B10.1	1	.TTTCAAA.	5	membrane part/signal transduction
F28B12.1	1	.TTTCAAA.	5	membrane part/signal transduction
F31F6.4	1	.TTTCAAA.	5	membrane part/signal transduction
F37B1.1	1	.TTTCAAA.	5	membrane part/signal transduction
F38A6.4	1	.TTTCAAA.	5	membrane part/signal transduction
F42A10.6	1	.TTTCAAA.	5	membrane part/signal transduction
F43D2.4	1	.TTTCAAA.	5	membrane part/signal transduction
F45E1.1	1	.TTTCAAA.	5	membrane part/signal transduction
F46C8.1	1	.TTTCAAA.	5	membrane part/signal transduction
F58A3.5	1	.TTTCAAA.	5	membrane part/signal transduction
F59B10.5	1	.TTTCAAA.	5	membrane part/signal transduction
K07A12.6	1	.TTTCAAA.	5	membrane part/signal transduction
K07E8.6	1	.TTTCAAA.	5	membrane part/signal transduction
K09E4.3	1	.TTTCAAA.	5	membrane part/signal transduction
K09E4.4	1	.TTTCAAA.	5	membrane part/signal transduction
K09F5.3	1	.TTTCAAA.	5	membrane part/signal transduction
K11H12.1	1	.TTTCAAA.	5	membrane part/signal transduction
M03B6.1	1	.TTTCAAA.	5	membrane part/signal transduction
R04B3.3	1	.TTTCAAA.	5	membrane part/signal transduction
R05F9.5	1	.TTTCAAA.	5	membrane part/signal transduction
R57.2	1	.TTTCAAA.	5	membrane part/signal transduction
R90.2	1	.TTTCAAA.	5	membrane part/signal transduction
T05A8.3	1	.TTTCAAA.	5	membrane part/signal transduction
T05F1.9	1	.TTTCAAA.	5	membrane part/signal transduction
T10B11.5	1	.TTTCAAA.	5	membrane part/signal transduction
T12B5.11	1	.TTTCAAA.	5	membrane part/signal transduction
T14A8.2	1	.TTTCAAA.	5	membrane part/signal transduction
T26H5.4	1	.TTTCAAA.	5	membrane part/signal transduction
T27A10.5	1	.TTTCAAA.	5	membrane part/signal transduction
T28A11.16	1	.TTTCAAA.	5	membrane part/signal transduction
T28C12.6	1	.TTTCAAA.	5	membrane part/signal transduction
W02B12.4	1	.TTTCAAA.	5	membrane part/signal transduction
W04E12.7	1	.TTTCAAA.	5	membrane part/signal transduction
Y105E8A.11	1	.TTTCAAA.	5	membrane part/signal transduction
Y110A7A.2	1	.TTTCAAA.	5	membrane part/signal transduction
Y113G7A.15	1	.TTTCAAA.	5	membrane part/signal transduction
Y113G7B.16	1	.TTTCAAA.	5	membrane part/signal transduction
Y17D7B.4	1	.TTTCAAA.	5	membrane part/signal transduction
Y22D7AR.4	1	.TTTCAAA.	5	membrane part/signal transduction
Y34B4A.9	1	.TTTCAAA.	5	membrane part/signal transduction
Y38H6C.9	1	.TTTCAAA.	5	membrane part/signal transduction
Y39F10A.1	1	.TTTCAAA.	5	membrane part/signal transduction
Y41C4A.8	1	.TTTCAAA.	5	membrane part/signal transduction
Y46G5A.20	1	.TTTCAAA.	5	membrane part/signal transduction
Y48B6A.9	1	.TTTCAAA.	5	membrane part/signal transduction
Y50E8A.1	1	.TTTCAAA.	5	membrane part/signal transduction
Y57A10B.3	1	.TTTCAAA.	5	membrane part/signal transduction
Y65B4BR.2	1	.TTTCAAA.	5	membrane part/signal transduction
Y69A2AL.1	1	.TTTCAAA.	5	membrane part/signal transduction
Y73B6BL.13	1	.TTTCAAA.	5	membrane part/signal transduction
ZC47.14	1	.TTTCAAA.	5	membrane part/signal transduction
ZK112.5	1	.TTTCAAA.	5	membrane part/signal transduction
ZK1128.7	1	.TTTCAAA.	5	membrane part/signal transduction
ZK402.3	1	.TTTCAAA.	5	membrane part/signal transduction
ZK678.8	1	.TTTCAAA.	5	membrane part/signal transduction
C03H5.5	9	.TTTCAAA.	5	membrane part/signal transduction
C06B3.6	9	.TTTCAAA.	5	membrane part/signal transduction
C08F1.5	9	.TTTCAAA.	5	membrane part/signal transduction
C09E9.2	9	.TTTCAAA.	5	membrane part/signal transduction
C31H1.6	9	.TTTCAAA.	5	membrane part/signal transduction
C34F11.8	9	.TTTCAAA.	5	membrane part/signal transduction
F13D2.1	9	.TTTCAAA.	5	membrane part/signal transduction
F15A8.6	9	.TTTCAAA.	5	membrane part/signal transduction
F35E12.10	9	.TTTCAAA.	5	membrane part/signal transduction
F36F2.2	9	.TTTCAAA.	5	membrane part/signal transduction
F41G3.10	9	.TTTCAAA.	5	membrane part/signal transduction
F58E2.3	9	.TTTCAAA.	5	membrane part/signal transduction
H35B03.1	9	.TTTCAAA.	5	membrane part/signal transduction
K02A11.3	9	.TTTCAAA.	5	membrane part/signal transduction
M01E11.4	9	.TTTCAAA.	5	membrane part/signal transduction
M02F4.3	9	.TTTCAAA.	5	membrane part/signal transduction
R11G11.7	9	.TTTCAAA.	5	membrane part/signal transduction
T04F8.7	9	.TTTCAAA.	5	membrane part/signal transduction
T19D12.6	9	.TTTCAAA.	5	membrane part/signal transduction
Y37D8A.2	9	.TTTCAAA.	5	membrane part/signal transduction
Y41G9A.3	9	.TTTCAAA.	5	membrane part/signal transduction
Y44A6D.3	9	.TTTCAAA.	5	membrane part/signal transduction
Y54G2A.32	9	.TTTCAAA.	5	membrane part/signal transduction
Y71H10A.2	9	.TTTCAAA.	5	membrane part/signal transduction
ZC116.1	9	.TTTCAAA.	5	membrane part/signal transduction
C01A2.7	1	.AC[AG]TCAT.	5.1	neuropeptide signalling pathway (v-JUN)
C03G5.7	1	.AC[AG]TCAT.	5.1	neuropeptide signalling pathway (v-JUN)
C37H5.11	1	.AC[AG]TCAT.	5.1	neuropeptide signalling pathway (v-JUN)
F35D11.1	1	.AC[AG]TCAT.	5.1	neuropeptide signalling pathway (v-JUN)
F52F12.1	1	.AC[AG]TCAT.	5.1	neuropeptide signalling pathway (v-JUN)
F54B8.4	1	.AC[AG]TCAT.	5.1	neuropeptide signalling pathway (v-JUN)
F54D5.4	1	.AC[AG]TCAT.	5.1	neuropeptide signalling pathway (v-JUN)
F58D5.5	1	.AC[AG]TCAT.	5.1	neuropeptide signalling pathway (v-JUN)
R13A5.4	1	.AC[AG]TCAT.	5.1	neuropeptide signalling pathway (v-JUN)
T01D1.3	1	.AC[AG]TCAT.	5.1	neuropeptide signalling pathway (v-JUN)
B0310.6	1	.AC[AG]TCAT.	8.7	neuropeptide signalling pathway (v-JUN)
C01C10.2	1	.AC[AG]TCAT.	8.7	neuropeptide signalling pathway (v-JUN)
C02A12.1	1	.AC[AG]TCAT.	8.7	neuropeptide signalling pathway (v-JUN)
C04E7.3	1	.AC[AG]TCAT.	8.7	neuropeptide signalling pathway (v-JUN)
C06H5.1	1	.AC[AG]TCAT.	8.7	neuropeptide signalling pathway (v-JUN)
C08B6.10	1	.AC[AG]TCAT.	8.7	neuropeptide signalling pathway (v-JUN)
C09E7.3	1	.AC[AG]TCAT.	8.7	neuropeptide signalling pathway (v-JUN)
C16B8.3	1	.AC[AG]TCAT.	8.7	neuropeptide signalling pathway (v-JUN)
C26F1.10	1	.AC[AG]TCAT.	8.7	neuropeptide signalling pathway (v-JUN)
C27H5.1	1	.AC[AG]TCAT.	8.7	neuropeptide signalling pathway (v-JUN)
C29F7.1	1	.AC[AG]TCAT.	8.7	neuropeptide signalling pathway (v-JUN)
C34D1.4	1	.AC[AG]TCAT.	8.7	neuropeptide signalling pathway (v-JUN)
C36C5.15	1	.AC[AG]TCAT.	8.7	neuropeptide signalling pathway (v-JUN)
C50E3.6	1	.AC[AG]TCAT.	8.7	neuropeptide signalling pathway (v-JUN)
C52D10.11	1	.AC[AG]TCAT.	8.7	neuropeptide signalling pathway (v-JUN)
C54D1.7	1	.AC[AG]TCAT.	8.7	neuropeptide signalling pathway (v-JUN)
D1025.6	1	.AC[AG]TCAT.	8.7	neuropeptide signalling pathway (v-JUN)
E03D2.2	1	.AC[AG]TCAT.	8.7	neuropeptide signalling pathway (v-JUN)
F08G5.3	1	.AC[AG]TCAT.	8.7	neuropeptide signalling pathway (v-JUN)
F11A6.2	1	.AC[AG]TCAT.	8.7	neuropeptide signalling pathway (v-JUN)
F13B9.2	1	.AC[AG]TCAT.	8.7	neuropeptide signalling pathway (v-JUN)
F13H10.6	1	.AC[AG]TCAT.	8.7	neuropeptide signalling pathway (v-JUN)
F14E5.5	1	.AC[AG]TCAT.	8.7	neuropeptide signalling pathway (v-JUN)
F15A4.6	1	.AC[AG]TCAT.	8.7	neuropeptide signalling pathway (v-JUN)
F23B12.3	1	.AC[AG]TCAT.	8.7	neuropeptide signalling pathway (v-JUN)
F23B2.5	1	.AC[AG]TCAT.	8.7	neuropeptide signalling pathway (v-JUN)
F23H11.7	1	.AC[AG]TCAT.	8.7	neuropeptide signalling pathway (v-JUN)
F35E12.8	1	.AC[AG]TCAT.	8.7	neuropeptide signalling pathway (v-JUN)
F35H10.2	1	.AC[AG]TCAT.	8.7	neuropeptide signalling pathway (v-JUN)
F36F2.1	1	.AC[AG]TCAT.	8.7	neuropeptide signalling pathway (v-JUN)
F37A8.4	1	.AC[AG]TCAT.	8.7	neuropeptide signalling pathway (v-JUN)
F39H2.1	1	.AC[AG]TCAT.	8.7	neuropeptide signalling pathway (v-JUN)
F42G8.7	1	.AC[AG]TCAT.	8.7	neuropeptide signalling pathway (v-JUN)
F44A6.4	1	.AC[AG]TCAT.	8.7	neuropeptide signalling pathway (v-JUN)
F49E11.11	1	.AC[AG]TCAT.	8.7	neuropeptide signalling pathway (v-JUN)
F52A8.4	1	.AC[AG]TCAT.	8.7	neuropeptide signalling pathway (v-JUN)
F52E10.4	1	.AC[AG]TCAT.	8.7	neuropeptide signalling pathway (v-JUN)
F53A9.7	1	.AC[AG]TCAT.	8.7	neuropeptide signalling pathway (v-JUN)
F58B4.6	1	.AC[AG]TCAT.	8.7	neuropeptide signalling pathway (v-JUN)
K02E10.6	1	.AC[AG]TCAT.	8.7	neuropeptide signalling pathway (v-JUN)
K03B4.4	1	.AC[AG]TCAT.	8.7	neuropeptide signalling pathway (v-JUN)
K04A8.3	1	.AC[AG]TCAT.	8.7	neuropeptide signalling pathway (v-JUN)
K07C5.9	1	.AC[AG]TCAT.	8.7	neuropeptide signalling pathway (v-JUN)
K09C8.6	1	.AC[AG]TCAT.	8.7	neuropeptide signalling pathway (v-JUN)
K09C8.7	1	.AC[AG]TCAT.	8.7	neuropeptide signalling pathway (v-JUN)
K10D11.6	1	.AC[AG]TCAT.	8.7	neuropeptide signalling pathway (v-JUN)
R01E6.7	1	.AC[AG]TCAT.	8.7	neuropeptide signalling pathway (v-JUN)
R05A10.3	1	.AC[AG]TCAT.	8.7	neuropeptide signalling pathway (v-JUN)
R08A2.7	1	.AC[AG]TCAT.	8.7	neuropeptide signalling pathway (v-JUN)
R10H1.4	1	.AC[AG]TCAT.	8.7	neuropeptide signalling pathway (v-JUN)
T05H10.8	1	.AC[AG]TCAT.	8.7	neuropeptide signalling pathway (v-JUN)
T08A9.2	1	.AC[AG]TCAT.	8.7	neuropeptide signalling pathway (v-JUN)
T08B6.2	1	.AC[AG]TCAT.	8.7	neuropeptide signalling pathway (v-JUN)
T10G3.3	1	.AC[AG]TCAT.	8.7	neuropeptide signalling pathway (v-JUN)
T11B7.2	1	.AC[AG]TCAT.	8.7	neuropeptide signalling pathway (v-JUN)
T22H6.7	1	.AC[AG]TCAT.	8.7	neuropeptide signalling pathway (v-JUN)
T23F11.6	1	.AC[AG]TCAT.	8.7	neuropeptide signalling pathway (v-JUN)
T28A11.2	1	.AC[AG]TCAT.	8.7	neuropeptide signalling pathway (v-JUN)
T28D6.7	1	.AC[AG]TCAT.	8.7	neuropeptide signalling pathway (v-JUN)
Y10G11A.3	1	.AC[AG]TCAT.	8.7	neuropeptide signalling pathway (v-JUN)
Y113G7A.16	1	.AC[AG]TCAT.	8.7	neuropeptide signalling pathway (v-JUN)
Y119C1B.6	1	.AC[AG]TCAT.	8.7	neuropeptide signalling pathway (v-JUN)
Y37E11B.7	1	.AC[AG]TCAT.	8.7	neuropeptide signalling pathway (v-JUN)
Y38H6C.1	1	.AC[AG]TCAT.	8.7	neuropeptide signalling pathway (v-JUN)
Y43B11AR.3	1	.AC[AG]TCAT.	8.7	neuropeptide signalling pathway (v-JUN)
Y44A6D.2	1	.AC[AG]TCAT.	8.7	neuropeptide signalling pathway (v-JUN)
Y45F10D.6	1	.AC[AG]TCAT.	8.7	neuropeptide signalling pathway (v-JUN)
Y47D3B.2	1	.AC[AG]TCAT.	8.7	neuropeptide signalling pathway (v-JUN)
Y4C6B.7	1	.AC[AG]TCAT.	8.7	neuropeptide signalling pathway (v-JUN)
Y82E9BL.14	1	.AC[AG]TCAT.	8.7	neuropeptide signalling pathway (v-JUN)
ZK105.5	1	.AC[AG]TCAT.	8.7	neuropeptide signalling pathway (v-JUN)
ZK593.2	1	.AC[AG]TCAT.	8.7	neuropeptide signalling pathway (v-JUN)
ZK896.5	1	.AC[AG]TCAT.	8.7	neuropeptide signalling pathway (v-JUN)
C13G3.3	7	[AT]CG[AG]A[AGT]TA[ACT]	5.5	nucleotide binding
K02B2.3	7	[AT]CG[AG]A[AGT]TA[ACT]	5.5	nucleotide binding
K05B2.2	7	[AT]CG[AG]A[AGT]TA[ACT]	5.5	nucleotide binding
R05F9.11	7	[AT]CG[AG]A[AGT]TA[ACT]	5.5	nucleotide binding
Y38F1A.10	7	[AT]CG[AG]A[AGT]TA[ACT]	5.5	nucleotide binding
Y55D9A.1	7	[AT]CG[AG]A[AGT]TA[ACT]	5.5	nucleotide binding
Y60A9A.1	7	[AT]CG[AG]A[AGT]TA[ACT]	5.5	nucleotide binding
B0304.2	3	[AG]A[AGT]CGC[AT][CG].	9.4	organelle part
B0511.9	3	[AG]A[AGT]CGC[AT][CG].	9.4	organelle part
C01G5.6	3	[AG]A[AGT]CGC[AT][CG].	9.4	organelle part
C02F5.6	3	[AG]A[AGT]CGC[AT][CG].	9.4	organelle part
C10F3.1	3	[AG]A[AGT]CGC[AT][CG].	9.4	organelle part
C25A1.9	3	[AG]A[AGT]CGC[AT][CG].	9.4	organelle part
C30A5.2	3	[AG]A[AGT]CGC[AT][CG].	9.4	organelle part
C32B5.10	3	[AG]A[AGT]CGC[AT][CG].	9.4	organelle part
C33H5.6	3	[AG]A[AGT]CGC[AT][CG].	9.4	organelle part
C34B2.2	3	[AG]A[AGT]CGC[AT][CG].	9.4	organelle part
C36C9.1	3	[AG]A[AGT]CGC[AT][CG].	9.4	organelle part
C38D4.4	3	[AG]A[AGT]CGC[AT][CG].	9.4	organelle part
C41D11.5	3	[AG]A[AGT]CGC[AT][CG].	9.4	organelle part
C43E11.12	3	[AG]A[AGT]CGC[AT][CG].	9.4	organelle part
C49C3.7	3	[AG]A[AGT]CGC[AT][CG].	9.4	organelle part
C50E3.12	3	[AG]A[AGT]CGC[AT][CG].	9.4	organelle part
C52A10.3	3	[AG]A[AGT]CGC[AT][CG].	9.4	organelle part
D1007.8	3	[AG]A[AGT]CGC[AT][CG].	9.4	organelle part
D1081.6	3	[AG]A[AGT]CGC[AT][CG].	9.4	organelle part
F02H6.2	3	[AG]A[AGT]CGC[AT][CG].	9.4	organelle part
F02H6.3	3	[AG]A[AGT]CGC[AT][CG].	9.4	organelle part
F07H5.10	3	[AG]A[AGT]CGC[AT][CG].	9.4	organelle part
F08F3.6	3	[AG]A[AGT]CGC[AT][CG].	9.4	organelle part
F08F8.4	3	[AG]A[AGT]CGC[AT][CG].	9.4	organelle part
F12E12.1	3	[AG]A[AGT]CGC[AT][CG].	9.4	organelle part
F14H3.3	3	[AG]A[AGT]CGC[AT][CG].	9.4	organelle part
F14H3.6	3	[AG]A[AGT]CGC[AT][CG].	9.4	organelle part
F22E5.17	3	[AG]A[AGT]CGC[AT][CG].	9.4	organelle part
F23F1.1	3	[AG]A[AGT]CGC[AT][CG].	9.4	organelle part
F26F4.6	3	[AG]A[AGT]CGC[AT][CG].	9.4	organelle part
F28F8.4	3	[AG]A[AGT]CGC[AT][CG].	9.4	organelle part
F31F6.3	3	[AG]A[AGT]CGC[AT][CG].	9.4	organelle part
F33G12.2	3	[AG]A[AGT]CGC[AT][CG].	9.4	organelle part
F35C8.8	3	[AG]A[AGT]CGC[AT][CG].	9.4	organelle part
F41G3.6	3	[AG]A[AGT]CGC[AT][CG].	9.4	organelle part
F45F2.11	3	[AG]A[AGT]CGC[AT][CG].	9.4	organelle part
F46B6.5	3	[AG]A[AGT]CGC[AT][CG].	9.4	organelle part
F49C12.9	3	[AG]A[AGT]CGC[AT][CG].	9.4	organelle part
F56A8.4	3	[AG]A[AGT]CGC[AT][CG].	9.4	organelle part
F57B10.4	3	[AG]A[AGT]CGC[AT][CG].	9.4	organelle part
F57C2.2	3	[AG]A[AGT]CGC[AT][CG].	9.4	organelle part
F58A4.2	3	[AG]A[AGT]CGC[AT][CG].	9.4	organelle part
F59G1.8	3	[AG]A[AGT]CGC[AT][CG].	9.4	organelle part
F59H5.3	3	[AG]A[AGT]CGC[AT][CG].	9.4	organelle part
K03B4.7	3	[AG]A[AGT]CGC[AT][CG].	9.4	organelle part
K06B9.3	3	[AG]A[AGT]CGC[AT][CG].	9.4	organelle part
K07G5.1	3	[AG]A[AGT]CGC[AT][CG].	9.4	organelle part
K08E7.1	3	[AG]A[AGT]CGC[AT][CG].	9.4	organelle part
K09E3.7	3	[AG]A[AGT]CGC[AT][CG].	9.4	organelle part
M01E5.4	3	[AG]A[AGT]CGC[AT][CG].	9.4	organelle part
M02B7.1	3	[AG]A[AGT]CGC[AT][CG].	9.4	organelle part
R04D3.3	3	[AG]A[AGT]CGC[AT][CG].	9.4	organelle part
R06C7.1	3	[AG]A[AGT]CGC[AT][CG].	9.4	organelle part
R07G3.7	3	[AG]A[AGT]CGC[AT][CG].	9.4	organelle part
R09A8.2	3	[AG]A[AGT]CGC[AT][CG].	9.4	organelle part
R107.5	3	[AG]A[AGT]CGC[AT][CG].	9.4	organelle part
R12E2.10	3	[AG]A[AGT]CGC[AT][CG].	9.4	organelle part
T01G9.2	3	[AG]A[AGT]CGC[AT][CG].	9.4	organelle part
T04A8.8	3	[AG]A[AGT]CGC[AT][CG].	9.4	organelle part
T04D3.8	3	[AG]A[AGT]CGC[AT][CG].	9.4	organelle part
T05B9.1	3	[AG]A[AGT]CGC[AT][CG].	9.4	organelle part
T05G11.1	3	[AG]A[AGT]CGC[AT][CG].	9.4	organelle part
T05G5.7	3	[AG]A[AGT]CGC[AT][CG].	9.4	organelle part
T06D4.1	3	[AG]A[AGT]CGC[AT][CG].	9.4	organelle part
T08D2.5	3	[AG]A[AGT]CGC[AT][CG].	9.4	organelle part
T19B10.4	3	[AG]A[AGT]CGC[AT][CG].	9.4	organelle part
T20G5.9	3	[AG]A[AGT]CGC[AT][CG].	9.4	organelle part
T22C1.4	3	[AG]A[AGT]CGC[AT][CG].	9.4	organelle part
T23D8.7	3	[AG]A[AGT]CGC[AT][CG].	9.4	organelle part
T28F3.3	3	[AG]A[AGT]CGC[AT][CG].	9.4	organelle part
W02F12.3	3	[AG]A[AGT]CGC[AT][CG].	9.4	organelle part
W03C9.2	3	[AG]A[AGT]CGC[AT][CG].	9.4	organelle part
Y11D7A.13	3	[AG]A[AGT]CGC[AT][CG].	9.4	organelle part
Y24F12A.3	3	[AG]A[AGT]CGC[AT][CG].	9.4	organelle part
Y38F2AR.1	3	[AG]A[AGT]CGC[AT][CG].	9.4	organelle part
Y39B6A.42	3	[AG]A[AGT]CGC[AT][CG].	9.4	organelle part
Y40B1A.1	3	[AG]A[AGT]CGC[AT][CG].	9.4	organelle part
Y46G5A.35	3	[AG]A[AGT]CGC[AT][CG].	9.4	organelle part
Y47D3A.15	3	[AG]A[AGT]CGC[AT][CG].	9.4	organelle part
Y48G10A.2	3	[AG]A[AGT]CGC[AT][CG].	9.4	organelle part
Y48G1A.6	3	[AG]A[AGT]CGC[AT][CG].	9.4	organelle part
Y48G1BL.3	3	[AG]A[AGT]CGC[AT][CG].	9.4	organelle part
Y49F6C.8	3	[AG]A[AGT]CGC[AT][CG].	9.4	organelle part
Y54E2A.8	3	[AG]A[AGT]CGC[AT][CG].	9.4	organelle part
Y57A10A.2	3	[AG]A[AGT]CGC[AT][CG].	9.4	organelle part
Y59A8B.12	3	[AG]A[AGT]CGC[AT][CG].	9.4	organelle part
Y66D12A.19	3	[AG]A[AGT]CGC[AT][CG].	9.4	organelle part
Y66D12A.6	3	[AG]A[AGT]CGC[AT][CG].	9.4	organelle part
Y67H2A.2	3	[AG]A[AGT]CGC[AT][CG].	9.4	organelle part
Y80D3A.9	3	[AG]A[AGT]CGC[AT][CG].	9.4	organelle part
Y97E10AR.4	3	[AG]A[AGT]CGC[AT][CG].	9.4	organelle part
ZK1248.7	3	[AG]A[AGT]CGC[AT][CG].	9.4	organelle part
ZK177.1	3	[AG]A[AGT]CGC[AT][CG].	9.4	organelle part
ZK616.5	3	[AG]A[AGT]CGC[AT][CG].	9.4	organelle part
ZK632.9	3	[AG]A[AGT]CGC[AT][CG].	9.4	organelle part
ZK858.3	3	[AG]A[AGT]CGC[AT][CG].	9.4	organelle part
C06A8.8	1	[ACT]A[CG]TA[CGT]AC[ACT]	4.4	receptor activity
C56G2.9	1	[ACT]A[CG]TA[CGT]AC[ACT]	4.4	receptor activity
K02F2.5	1	[ACT]A[CG]TA[CGT]AC[ACT]	4.4	receptor activity
R11G1.3	1	[ACT]A[CG]TA[CGT]AC[ACT]	4.4	receptor activity
ZK652.8	1	[ACT]A[CG]TA[CGT]AC[ACT]	4.4	receptor activity
B0238.1	8	.TTGCCA[AC][ACT]	4.4	receptor activity/signal transduction
C33B4.3	8	.TTGCCA[AC][ACT]	4.4	receptor activity/signal transduction
C37A5.4	8	.TTGCCA[AC][ACT]	4.4	receptor activity/signal transduction
F16D3.7	8	.TTGCCA[AC][ACT]	4.4	receptor activity/signal transduction
F18G5.4	8	.TTGCCA[AC][ACT]	4.4	receptor activity/signal transduction
F38H4.3	8	.TTGCCA[AC][ACT]	4.4	receptor activity/signal transduction
F40F9.10	8	.TTGCCA[AC][ACT]	4.4	receptor activity/signal transduction
F43E2.3	8	.TTGCCA[AC][ACT]	4.4	receptor activity/signal transduction
F54D5.15	8	.TTGCCA[AC][ACT]	4.4	receptor activity/signal transduction
F56D12.4	8	.TTGCCA[AC][ACT]	4.4	receptor activity/signal transduction
H23L24.3	8	.TTGCCA[AC][ACT]	4.4	receptor activity/signal transduction
K11D12.1	8	.TTGCCA[AC][ACT]	4.4	receptor activity/signal transduction
M03F4.3	8	.TTGCCA[AC][ACT]	4.4	receptor activity/signal transduction
R06C1.6	8	.TTGCCA[AC][ACT]	4.4	receptor activity/signal transduction
R08D7.4	8	.TTGCCA[AC][ACT]	4.4	receptor activity/signal transduction
T03G11.5	8	.TTGCCA[AC][ACT]	4.4	receptor activity/signal transduction
T07F12.1	8	.TTGCCA[AC][ACT]	4.4	receptor activity/signal transduction
T08G11.3	8	.TTGCCA[AC][ACT]	4.4	receptor activity/signal transduction
T21G5.5	8	.TTGCCA[AC][ACT]	4.4	receptor activity/signal transduction
Y39B6A.14	8	.TTGCCA[AC][ACT]	4.4	receptor activity/signal transduction
Y39B6A.15	8	.TTGCCA[AC][ACT]	4.4	receptor activity/signal transduction
Y41G9A.5	8	.TTGCCA[AC][ACT]	4.4	receptor activity/signal transduction
Y45F10B.10	8	.TTGCCA[AC][ACT]	4.4	receptor activity/signal transduction
Y53G8AL.1	8	.TTGCCA[AC][ACT]	4.4	receptor activity/signal transduction
C18E9.7	11	.TTGCCA[AC][ACT]	6.6	receptor activity/signal transduction
C50F4.8	11	.TTGCCA[AC][ACT]	6.6	receptor activity/signal transduction
E02C12.8	11	.TTGCCA[AC][ACT]	6.6	receptor activity/signal transduction
F01D5.5	11	.TTGCCA[AC][ACT]	6.6	receptor activity/signal transduction
F13C5.6	11	.TTGCCA[AC][ACT]	6.6	receptor activity/signal transduction
F14F9.4	11	.TTGCCA[AC][ACT]	6.6	receptor activity/signal transduction
F14H12.3	11	.TTGCCA[AC][ACT]	6.6	receptor activity/signal transduction
F18E9.3	11	.TTGCCA[AC][ACT]	6.6	receptor activity/signal transduction
F20B10.3	11	.TTGCCA[AC][ACT]	6.6	receptor activity/signal transduction
F35E12.7	11	.TTGCCA[AC][ACT]	6.6	receptor activity/signal transduction
F40F4.8	11	.TTGCCA[AC][ACT]	6.6	receptor activity/signal transduction
F41D9.3	11	.TTGCCA[AC][ACT]	6.6	receptor activity/signal transduction
F44B9.2	11	.TTGCCA[AC][ACT]	6.6	receptor activity/signal transduction
F47G3.1	11	.TTGCCA[AC][ACT]	6.6	receptor activity/signal transduction
F48C1.1	11	.TTGCCA[AC][ACT]	6.6	receptor activity/signal transduction
F53B2.8	11	.TTGCCA[AC][ACT]	6.6	receptor activity/signal transduction
F54B11.11	11	.TTGCCA[AC][ACT]	6.6	receptor activity/signal transduction
F55A12.9	11	.TTGCCA[AC][ACT]	6.6	receptor activity/signal transduction
F55C12.1	11	.TTGCCA[AC][ACT]	6.6	receptor activity/signal transduction
F55D12.2	11	.TTGCCA[AC][ACT]	6.6	receptor activity/signal transduction
H06I04.6	11	.TTGCCA[AC][ACT]	6.6	receptor activity/signal transduction
K07E1.1	11	.TTGCCA[AC][ACT]	6.6	receptor activity/signal transduction
T03F6.4	11	.TTGCCA[AC][ACT]	6.6	receptor activity/signal transduction
T05B4.3	11	.TTGCCA[AC][ACT]	6.6	receptor activity/signal transduction
T05D4.4	11	.TTGCCA[AC][ACT]	6.6	receptor activity/signal transduction
T15B12.1	11	.TTGCCA[AC][ACT]	6.6	receptor activity/signal transduction
T22C8.6	11	.TTGCCA[AC][ACT]	6.6	receptor activity/signal transduction
T23F2.2	11	.TTGCCA[AC][ACT]	6.6	receptor activity/signal transduction
Y38H6C.11	11	.TTGCCA[AC][ACT]	6.6	receptor activity/signal transduction
Y41D4B.18	11	.TTGCCA[AC][ACT]	6.6	receptor activity/signal transduction
Y43D4A.7	11	.TTGCCA[AC][ACT]	6.6	receptor activity/signal transduction
Y43E12A.2	11	.TTGCCA[AC][ACT]	6.6	receptor activity/signal transduction
Y48A6B.2	11	.TTGCCA[AC][ACT]	6.6	receptor activity/signal transduction
C03D6.4	2	[CGT]CG[AC]GA[AT][CG][AGT]	6.4	reproduction and gametogenesis (HSF)
C05C10.2	2	[CGT]CG[AC]GA[AT][CG][AGT]	6.4	reproduction and gametogenesis (HSF)
C17E4.10	2	[CGT]CG[AC]GA[AT][CG][AGT]	6.4	reproduction and gametogenesis (HSF)
C37C3.1	2	[CGT]CG[AC]GA[AT][CG][AGT]	6.4	reproduction and gametogenesis (HSF)
F18A1.4	2	[CGT]CG[AC]GA[AT][CG][AGT]	6.4	reproduction and gametogenesis (HSF)
F18C5.3	2	[CGT]CG[AC]GA[AT][CG][AGT]	6.4	reproduction and gametogenesis (HSF)
F20B6.9	2	[CGT]CG[AC]GA[AT][CG][AGT]	6.4	reproduction and gametogenesis (HSF)
F21D5.6	2	[CGT]CG[AC]GA[AT][CG][AGT]	6.4	reproduction and gametogenesis (HSF)
F26H9.2	2	[CGT]CG[AC]GA[AT][CG][AGT]	6.4	reproduction and gametogenesis (HSF)
F55A12.5	2	[CGT]CG[AC]GA[AT][CG][AGT]	6.4	reproduction and gametogenesis (HSF)
F58B3.6	2	[CGT]CG[AC]GA[AT][CG][AGT]	6.4	reproduction and gametogenesis (HSF)
R02D3.7	2	[CGT]CG[AC]GA[AT][CG][AGT]	6.4	reproduction and gametogenesis (HSF)
R13A5.7	2	[CGT]CG[AC]GA[AT][CG][AGT]	6.4	reproduction and gametogenesis (HSF)
T01H10.8	2	[CGT]CG[AC]GA[AT][CG][AGT]	6.4	reproduction and gametogenesis (HSF)
T04D3.1	2	[CGT]CG[AC]GA[AT][CG][AGT]	6.4	reproduction and gametogenesis (HSF)
Y9D1A.2	2	[CGT]CG[AC]GA[AT][CG][AGT]	6.4	reproduction and gametogenesis (HSF)
C08F8.3	3	[CGT]CG[AC]GA[AT][CG][AGT]	5.2	reproduction and gametogenesis (HSF)
F23B2.6	3	[CGT]CG[AC]GA[AT][CG][AGT]	5.2	reproduction and gametogenesis (HSF)
F31B9.3	3	[CGT]CG[AC]GA[AT][CG][AGT]	5.2	reproduction and gametogenesis (HSF)
K06H7.7	3	[CGT]CG[AC]GA[AT][CG][AGT]	5.2	reproduction and gametogenesis (HSF)
K08F9.2	3	[CGT]CG[AC]GA[AT][CG][AGT]	5.2	reproduction and gametogenesis (HSF)
T01C3.9	3	[CGT]CG[AC]GA[AT][CG][AGT]	5.2	reproduction and gametogenesis (HSF)
Y39E4B.2	3	[CGT]CG[AC]GA[AT][CG][AGT]	5.2	reproduction and gametogenesis (HSF)
AC8.1	7	[CGT]CG[AC]GA[AT][CG][AGT]	7	reproduction and gametogenesis (HSF)
B0001.5	7	[CGT]CG[AC]GA[AT][CG][AGT]	7	reproduction and gametogenesis (HSF)
C04G6.4	7	[CGT]CG[AC]GA[AT][CG][AGT]	7	reproduction and gametogenesis (HSF)
C18E3.6	7	[CGT]CG[AC]GA[AT][CG][AGT]	7	reproduction and gametogenesis (HSF)
F36D4.5	7	[CGT]CG[AC]GA[AT][CG][AGT]	7	reproduction and gametogenesis (HSF)
F39B2.11	7	[CGT]CG[AC]GA[AT][CG][AGT]	7	reproduction and gametogenesis (HSF)
F44E7.5	7	[CGT]CG[AC]GA[AT][CG][AGT]	7	reproduction and gametogenesis (HSF)
F53H1.3	7	[CGT]CG[AC]GA[AT][CG][AGT]	7	reproduction and gametogenesis (HSF)
F54A3.6	7	[CGT]CG[AC]GA[AT][CG][AGT]	7	reproduction and gametogenesis (HSF)
F56C9.10	7	[CGT]CG[AC]GA[AT][CG][AGT]	7	reproduction and gametogenesis (HSF)
H06H21.6	7	[CGT]CG[AC]GA[AT][CG][AGT]	7	reproduction and gametogenesis (HSF)
H14E04.2	7	[CGT]CG[AC]GA[AT][CG][AGT]	7	reproduction and gametogenesis (HSF)
K03B4.2	7	[CGT]CG[AC]GA[AT][CG][AGT]	7	reproduction and gametogenesis (HSF)
K09B11.2	7	[CGT]CG[AC]GA[AT][CG][AGT]	7	reproduction and gametogenesis (HSF)
R01H10.7	7	[CGT]CG[AC]GA[AT][CG][AGT]	7	reproduction and gametogenesis (HSF)
R05H10.3	7	[CGT]CG[AC]GA[AT][CG][AGT]	7	reproduction and gametogenesis (HSF)
R74.8	7	[CGT]CG[AC]GA[AT][CG][AGT]	7	reproduction and gametogenesis (HSF)
T08A9.4	7	[CGT]CG[AC]GA[AT][CG][AGT]	7	reproduction and gametogenesis (HSF)
W01A8.1	7	[CGT]CG[AC]GA[AT][CG][AGT]	7	reproduction and gametogenesis (HSF)
Y110A7A.15	7	[CGT]CG[AC]GA[AT][CG][AGT]	7	reproduction and gametogenesis (HSF)
Y111B2A.15	7	[CGT]CG[AC]GA[AT][CG][AGT]	7	reproduction and gametogenesis (HSF)
Y24D9A.2	7	[CGT]CG[AC]GA[AT][CG][AGT]	7	reproduction and gametogenesis (HSF)
Y48G1C.1	7	[CGT]CG[AC]GA[AT][CG][AGT]	7	reproduction and gametogenesis (HSF)
Y4C6B.1	7	[CGT]CG[AC]GA[AT][CG][AGT]	7	reproduction and gametogenesis (HSF)
Y52D3.1	7	[CGT]CG[AC]GA[AT][CG][AGT]	7	reproduction and gametogenesis (HSF)
Y53F4B.9	7	[CGT]CG[AC]GA[AT][CG][AGT]	7	reproduction and gametogenesis (HSF)
Y56A3A.17	7	[CGT]CG[AC]GA[AT][CG][AGT]	7	reproduction and gametogenesis (HSF)
Y71F9AR.3	7	[CGT]CG[AC]GA[AT][CG][AGT]	7	reproduction and gametogenesis (HSF)
Y75B8A.25	7	[CGT]CG[AC]GA[AT][CG][AGT]	7	reproduction and gametogenesis (HSF)
ZC317.7	7	[CGT]CG[AC]GA[AT][CG][AGT]	7	reproduction and gametogenesis (HSF)
B0001.3	2	.[ACT]A[CT]GCGC.	12.1	organ development
B0205.1	2	.[ACT]A[CT]GCGC.	12.1	organ development
B0336.6	2	.[ACT]A[CT]GCGC.	12.1	organ development
B0495.5	2	.[ACT]A[CT]GCGC.	12.1	organ development
B0546.2	2	.[ACT]A[CT]GCGC.	12.1	organ development
C01G5.8	2	.[ACT]A[CT]GCGC.	12.1	organ development
C02F5.4	2	.[ACT]A[CT]GCGC.	12.1	organ development
C06A6.3	2	.[ACT]A[CT]GCGC.	12.1	organ development
C07E3.2	2	.[ACT]A[CT]GCGC.	12.1	organ development
C08A9.8	2	.[ACT]A[CT]GCGC.	12.1	organ development
C13F10.6	2	.[ACT]A[CT]GCGC.	12.1	organ development
C16A11.2	2	.[ACT]A[CT]GCGC.	12.1	organ development
C16C2.4	2	.[ACT]A[CT]GCGC.	12.1	organ development
C23G10.7	2	.[ACT]A[CT]GCGC.	12.1	organ development
C24G6.3	2	.[ACT]A[CT]GCGC.	12.1	organ development
C25A1.1	2	.[ACT]A[CT]GCGC.	12.1	organ development
C41A3.2	2	.[ACT]A[CT]GCGC.	12.1	organ development
C41D11.3	2	.[ACT]A[CT]GCGC.	12.1	organ development
C42C1.15	2	.[ACT]A[CT]GCGC.	12.1	organ development
C42C1.4	2	.[ACT]A[CT]GCGC.	12.1	organ development
C52E12.4	2	.[ACT]A[CT]GCGC.	12.1	organ development
C56E6.1	2	.[ACT]A[CT]GCGC.	12.1	organ development
C56E6.3	2	.[ACT]A[CT]GCGC.	12.1	organ development
D1054.13	2	.[ACT]A[CT]GCGC.	12.1	organ development
D2096.7	2	.[ACT]A[CT]GCGC.	12.1	organ development
EEED8.1	2	.[ACT]A[CT]GCGC.	12.1	organ development
F01F1.1	2	.[ACT]A[CT]GCGC.	12.1	organ development
F02E9.4	2	.[ACT]A[CT]GCGC.	12.1	organ development
F08G12.3	2	.[ACT]A[CT]GCGC.	12.1	organ development
F10C2.2	2	.[ACT]A[CT]GCGC.	12.1	organ development
F10D11.2	2	.[ACT]A[CT]GCGC.	12.1	organ development
F10E7.11	2	.[ACT]A[CT]GCGC.	12.1	organ development
F15E6.1	2	.[ACT]A[CT]GCGC.	12.1	organ development
F18A1.5	2	.[ACT]A[CT]GCGC.	12.1	organ development
F18E2.2	2	.[ACT]A[CT]GCGC.	12.1	organ development
F26A3.7	2	.[ACT]A[CT]GCGC.	12.1	organ development
F26F4.5	2	.[ACT]A[CT]GCGC.	12.1	organ development
F37E3.1	2	.[ACT]A[CT]GCGC.	12.1	organ development
F38E9.1	2	.[ACT]A[CT]GCGC.	12.1	organ development
F39B2.3	2	.[ACT]A[CT]GCGC.	12.1	organ development
F40E3.2	2	.[ACT]A[CT]GCGC.	12.1	organ development
F41H10.3	2	.[ACT]A[CT]GCGC.	12.1	organ development
F42A10.5	2	.[ACT]A[CT]GCGC.	12.1	organ development
F43H9.3	2	.[ACT]A[CT]GCGC.	12.1	organ development
F45E4.10	2	.[ACT]A[CT]GCGC.	12.1	organ development
F46F11.6	2	.[ACT]A[CT]GCGC.	12.1	organ development
F53A2.8	2	.[ACT]A[CT]GCGC.	12.1	organ development
F56D12.6	2	.[ACT]A[CT]GCGC.	12.1	organ development
F57B9.7	2	.[ACT]A[CT]GCGC.	12.1	organ development
F58H1.1	2	.[ACT]A[CT]GCGC.	12.1	organ development
H14E04.5	2	.[ACT]A[CT]GCGC.	12.1	organ development
JC8.11	2	.[ACT]A[CT]GCGC.	12.1	organ development
K05C4.5	2	.[ACT]A[CT]GCGC.	12.1	organ development
K06A5.4	2	.[ACT]A[CT]GCGC.	12.1	organ development
K10C8.3	2	.[ACT]A[CT]GCGC.	12.1	organ development
M57.1	2	.[ACT]A[CT]GCGC.	12.1	organ development
R02D3.4	2	.[ACT]A[CT]GCGC.	12.1	organ development
R05F9.9	2	.[ACT]A[CT]GCGC.	12.1	organ development
R06F6.4	2	.[ACT]A[CT]GCGC.	12.1	organ development
R06F6.8	2	.[ACT]A[CT]GCGC.	12.1	organ development
R11E3.7	2	.[ACT]A[CT]GCGC.	12.1	organ development
R11H6.3	2	.[ACT]A[CT]GCGC.	12.1	organ development
T16G12.6	2	.[ACT]A[CT]GCGC.	12.1	organ development
T18H9.7	2	.[ACT]A[CT]GCGC.	12.1	organ development
T25B9.8	2	.[ACT]A[CT]GCGC.	12.1	organ development
T28A8.6	2	.[ACT]A[CT]GCGC.	12.1	organ development
W02D3.11	2	.[ACT]A[CT]GCGC.	12.1	organ development
W03A5.4	2	.[ACT]A[CT]GCGC.	12.1	organ development
W03F8.4	2	.[ACT]A[CT]GCGC.	12.1	organ development
W06B4.2	2	.[ACT]A[CT]GCGC.	12.1	organ development
Y102E9.2	2	.[ACT]A[CT]GCGC.	12.1	organ development
Y104H12D.2	2	.[ACT]A[CT]GCGC.	12.1	organ development
Y32H12A.8	2	.[ACT]A[CT]GCGC.	12.1	organ development
Y37E11AM.1	2	.[ACT]A[CT]GCGC.	12.1	organ development
Y38C9A.1	2	.[ACT]A[CT]GCGC.	12.1	organ development
Y38F2AR.6	2	.[ACT]A[CT]GCGC.	12.1	organ development
Y39B6A.37	2	.[ACT]A[CT]GCGC.	12.1	organ development
Y40D12A.1	2	.[ACT]A[CT]GCGC.	12.1	organ development
Y47H9C.8	2	.[ACT]A[CT]GCGC.	12.1	organ development
Y54G11A.2	2	.[ACT]A[CT]GCGC.	12.1	organ development
Y56A3A.31	2	.[ACT]A[CT]GCGC.	12.1	organ development
ZC477.5	2	.[ACT]A[CT]GCGC.	12.1	organ development
ZK1248.13	2	.[ACT]A[CT]GCGC.	12.1	organ development
ZK177.4	2	.[ACT]A[CT]GCGC.	12.1	organ development
ZK287.6	2	.[ACT]A[CT]GCGC.	12.1	organ development
ZK353.1	2	.[ACT]A[CT]GCGC.	12.1	organ development
ZK370.3	2	.[ACT]A[CT]GCGC.	12.1	organ development
ZK632.5	2	.[ACT]A[CT]GCGC.	12.1	organ development
ZK742.2	2	.[ACT]A[CT]GCGC.	12.1	organ development
ZK863.3	2	.[ACT]A[CT]GCGC.	12.1	organ development
ZK863.4	2	.[ACT]A[CT]GCGC.	12.1	organ development
B0238.9	3	.[ACT]A[CT]GCGC.	9.1	organ development
B0432.10	3	.[ACT]A[CT]GCGC.	9.1	organ development
B0546.4	3	.[ACT]A[CT]GCGC.	9.1	organ development
C03A7.8	3	.[ACT]A[CT]GCGC.	9.1	organ development
C09G9.2	3	.[ACT]A[CT]GCGC.	9.1	organ development
C29A12.1	3	.[ACT]A[CT]GCGC.	9.1	organ development
C33E10.2	3	.[ACT]A[CT]GCGC.	9.1	organ development
C41G7.4	3	.[ACT]A[CT]GCGC.	9.1	organ development
C44B7.1	3	.[ACT]A[CT]GCGC.	9.1	organ development
C45H4.14	3	.[ACT]A[CT]GCGC.	9.1	organ development
C53D6.4	3	.[ACT]A[CT]GCGC.	9.1	organ development
C56G2.5	3	.[ACT]A[CT]GCGC.	9.1	organ development
CD4.7	3	.[ACT]A[CT]GCGC.	9.1	organ development
D2005.4	3	.[ACT]A[CT]GCGC.	9.1	organ development
F01D4.5	3	.[ACT]A[CT]GCGC.	9.1	organ development
F13A2.4	3	.[ACT]A[CT]GCGC.	9.1	organ development
F14H3.5	3	.[ACT]A[CT]GCGC.	9.1	organ development
F21F3.4	3	.[ACT]A[CT]GCGC.	9.1	organ development
F25B5.3	3	.[ACT]A[CT]GCGC.	9.1	organ development
F26H9.1	3	.[ACT]A[CT]GCGC.	9.1	organ development
F31B9.2	3	.[ACT]A[CT]GCGC.	9.1	organ development
F43G6.10	3	.[ACT]A[CT]GCGC.	9.1	organ development
F43G6.7	3	.[ACT]A[CT]GCGC.	9.1	organ development
F44F4.2	3	.[ACT]A[CT]GCGC.	9.1	organ development
F45D11.9	3	.[ACT]A[CT]GCGC.	9.1	organ development
F54C8.5	3	.[ACT]A[CT]GCGC.	9.1	organ development
F54D10.5	3	.[ACT]A[CT]GCGC.	9.1	organ development
F56G4.3	3	.[ACT]A[CT]GCGC.	9.1	organ development
F57C2.1	3	.[ACT]A[CT]GCGC.	9.1	organ development
F58B3.9	3	.[ACT]A[CT]GCGC.	9.1	organ development
K08H2.3	3	.[ACT]A[CT]GCGC.	9.1	organ development
M02G9.2	3	.[ACT]A[CT]GCGC.	9.1	organ development
M03E7.5	3	.[ACT]A[CT]GCGC.	9.1	organ development
R144.10	3	.[ACT]A[CT]GCGC.	9.1	organ development
T12D8.3	3	.[ACT]A[CT]GCGC.	9.1	organ development
T21B10.5	3	.[ACT]A[CT]GCGC.	9.1	organ development
T23G4.3	3	.[ACT]A[CT]GCGC.	9.1	organ development
T24H7.4	3	.[ACT]A[CT]GCGC.	9.1	organ development
Y22D7AL.7	3	.[ACT]A[CT]GCGC.	9.1	organ development
Y37H2A.5	3	.[ACT]A[CT]GCGC.	9.1	organ development
Y47D3A.28	3	.[ACT]A[CT]GCGC.	9.1	organ development
Y48G1A.2	3	.[ACT]A[CT]GCGC.	9.1	organ development
Y66D12A.16	3	.[ACT]A[CT]GCGC.	9.1	organ development
Y75D11A.3	3	.[ACT]A[CT]GCGC.	9.1	organ development
Y94H6A.3	3	.[ACT]A[CT]GCGC.	9.1	organ development
Y94H6A.9	3	.[ACT]A[CT]GCGC.	9.1	organ development
Y97E10AR.3	3	.[ACT]A[CT]GCGC.	9.1	organ development
ZK287.7	3	.[ACT]A[CT]GCGC.	9.1	organ development
C01G8.9	4	.[ACT]A[CT]GCGC.	10.1	organ development
C05G5.2	4	.[ACT]A[CT]GCGC.	10.1	organ development
C10G11.7	4	.[ACT]A[CT]GCGC.	10.1	organ development
C15C7.2	4	.[ACT]A[CT]GCGC.	10.1	organ development
C16H3.3	4	.[ACT]A[CT]GCGC.	10.1	organ development
C26C6.1	4	.[ACT]A[CT]GCGC.	10.1	organ development
C33G3.6	4	.[ACT]A[CT]GCGC.	10.1	organ development
C34E11.1	4	.[ACT]A[CT]GCGC.	10.1	organ development
C35C5.6	4	.[ACT]A[CT]GCGC.	10.1	organ development
C41H7.9	4	.[ACT]A[CT]GCGC.	10.1	organ development
D2092.2	4	.[ACT]A[CT]GCGC.	10.1	organ development
F07E5.6	4	.[ACT]A[CT]GCGC.	10.1	organ development
F09C8.2	4	.[ACT]A[CT]GCGC.	10.1	organ development
F15D4.2	4	.[ACT]A[CT]GCGC.	10.1	organ development
F16B12.6	4	.[ACT]A[CT]GCGC.	10.1	organ development
F39G3.3	4	.[ACT]A[CT]GCGC.	10.1	organ development
F46F6.1	4	.[ACT]A[CT]GCGC.	10.1	organ development
F52F12.6	4	.[ACT]A[CT]GCGC.	10.1	organ development
F52G3.1	4	.[ACT]A[CT]GCGC.	10.1	organ development
F53F8.5	4	.[ACT]A[CT]GCGC.	10.1	organ development
F54E4.1	4	.[ACT]A[CT]GCGC.	10.1	organ development
F57B9.2	4	.[ACT]A[CT]GCGC.	10.1	organ development
K10C3.2	4	.[ACT]A[CT]GCGC.	10.1	organ development
T03G11.6	4	.[ACT]A[CT]GCGC.	10.1	organ development
T13H2.5	4	.[ACT]A[CT]GCGC.	10.1	organ development
VY35H6BL.1	4	.[ACT]A[CT]GCGC.	10.1	organ development
Y119D3B.12	4	.[ACT]A[CT]GCGC.	10.1	organ development
Y23H5A.2	4	.[ACT]A[CT]GCGC.	10.1	organ development
Y48G8AL.7	4	.[ACT]A[CT]GCGC.	10.1	organ development
Y66D12A.5	4	.[ACT]A[CT]GCGC.	10.1	organ development
Y69A2AR.1	4	.[ACT]A[CT]GCGC.	10.1	organ development
Y6B3A.1	4	.[ACT]A[CT]GCGC.	10.1	organ development
B0393.3	7	.[ACT]A[CT]GCGC.	10.9	organ development
C01G5.2	7	.[ACT]A[CT]GCGC.	10.9	organ development
C14B1.7	7	.[ACT]A[CT]GCGC.	10.9	organ development
C27H6.4	7	.[ACT]A[CT]GCGC.	10.9	organ development
D1081.7	7	.[ACT]A[CT]GCGC.	10.9	organ development
D2030.6	7	.[ACT]A[CT]GCGC.	10.9	organ development
F16A11.3	7	.[ACT]A[CT]GCGC.	10.9	organ development
F19F10.11	7	.[ACT]A[CT]GCGC.	10.9	organ development
F30F8.1	7	.[ACT]A[CT]GCGC.	10.9	organ development
F33G12.5	7	.[ACT]A[CT]GCGC.	10.9	organ development
F38A5.1	7	.[ACT]A[CT]GCGC.	10.9	organ development
F44B9.4	7	.[ACT]A[CT]GCGC.	10.9	organ development
F47D12.9	7	.[ACT]A[CT]GCGC.	10.9	organ development
F48E8.7	7	.[ACT]A[CT]GCGC.	10.9	organ development
F53C11.4	7	.[ACT]A[CT]GCGC.	10.9	organ development
F53F4.12	7	.[ACT]A[CT]GCGC.	10.9	organ development
F56A6.1	7	.[ACT]A[CT]GCGC.	10.9	organ development
F58G11.1	7	.[ACT]A[CT]GCGC.	10.9	organ development
K07A1.2	7	.[ACT]A[CT]GCGC.	10.9	organ development
K08E3.3	7	.[ACT]A[CT]GCGC.	10.9	organ development
K09H9.2	7	.[ACT]A[CT]GCGC.	10.9	organ development
M01B12.4	7	.[ACT]A[CT]GCGC.	10.9	organ development
M01H9.3	7	.[ACT]A[CT]GCGC.	10.9	organ development
R119.7	7	.[ACT]A[CT]GCGC.	10.9	organ development
T05B11.3	7	.[ACT]A[CT]GCGC.	10.9	organ development
T07C4.3	7	.[ACT]A[CT]GCGC.	10.9	organ development
T10C6.10	7	.[ACT]A[CT]GCGC.	10.9	organ development
T11G6.5	7	.[ACT]A[CT]GCGC.	10.9	organ development
T12E12.3	7	.[ACT]A[CT]GCGC.	10.9	organ development
W09C5.7	7	.[ACT]A[CT]GCGC.	10.9	organ development
Y105E8A.8	7	.[ACT]A[CT]GCGC.	10.9	organ development
Y105E8B.2	7	.[ACT]A[CT]GCGC.	10.9	organ development
Y32B12B.2	7	.[ACT]A[CT]GCGC.	10.9	organ development
Y34D9A.10	7	.[ACT]A[CT]GCGC.	10.9	organ development
Y39G10AR.9	7	.[ACT]A[CT]GCGC.	10.9	organ development
Y42G9A.6	7	.[ACT]A[CT]GCGC.	10.9	organ development
Y47G6A.12	7	.[ACT]A[CT]GCGC.	10.9	organ development
Y48A6B.11	7	.[ACT]A[CT]GCGC.	10.9	organ development
Y54F10AR.2	7	.[ACT]A[CT]GCGC.	10.9	organ development
Y66D12A.17	7	.[ACT]A[CT]GCGC.	10.9	organ development
Y73E7A.1	7	.[ACT]A[CT]GCGC.	10.9	organ development
ZC302.2	7	.[ACT]A[CT]GCGC.	10.9	organ development
ZK1067.3	7	.[ACT]A[CT]GCGC.	10.9	organ development
B0495.8	2	.[AG]ATCGAT[AT]	8.5	neuronal development (CDP)
C03H5.3	2	.[AG]ATCGAT[AT]	8.5	neuronal development (CDP)
C07E3.1	2	.[AG]ATCGAT[AT]	8.5	neuronal development (CDP)
C37A2.8	2	.[AG]ATCGAT[AT]	8.5	neuronal development (CDP)
C44E4.2	2	.[AG]ATCGAT[AT]	8.5	neuronal development (CDP)
C50B6.3	2	.[AG]ATCGAT[AT]	8.5	neuronal development (CDP)
C56C10.7	2	.[AG]ATCGAT[AT]	8.5	neuronal development (CDP)
D2007.5	2	.[AG]ATCGAT[AT]	8.5	neuronal development (CDP)
F15B9.5	2	.[AG]ATCGAT[AT]	8.5	neuronal development (CDP)
F20B6.7	2	.[AG]ATCGAT[AT]	8.5	neuronal development (CDP)
F32H2.4	2	.[AG]ATCGAT[AT]	8.5	neuronal development (CDP)
F41H10.4	2	.[AG]ATCGAT[AT]	8.5	neuronal development (CDP)
F45E12.1	2	.[AG]ATCGAT[AT]	8.5	neuronal development (CDP)
F45E4.2	2	.[AG]ATCGAT[AT]	8.5	neuronal development (CDP)
F56E10.1	2	.[AG]ATCGAT[AT]	8.5	neuronal development (CDP)
F57C2.6	2	.[AG]ATCGAT[AT]	8.5	neuronal development (CDP)
R04F11.3	2	.[AG]ATCGAT[AT]	8.5	neuronal development (CDP)
T01C3.8	2	.[AG]ATCGAT[AT]	8.5	neuronal development (CDP)
T04A8.10	2	.[AG]ATCGAT[AT]	8.5	neuronal development (CDP)
T05A12.3	2	.[AG]ATCGAT[AT]	8.5	neuronal development (CDP)
T10E9.2	2	.[AG]ATCGAT[AT]	8.5	neuronal development (CDP)
T22C1.10	2	.[AG]ATCGAT[AT]	8.5	neuronal development (CDP)
T23B3.1	2	.[AG]ATCGAT[AT]	8.5	neuronal development (CDP)
T23B5.1	2	.[AG]ATCGAT[AT]	8.5	neuronal development (CDP)
W09B6.3	2	.[AG]ATCGAT[AT]	8.5	neuronal development (CDP)
Y110A7A.16	2	.[AG]ATCGAT[AT]	8.5	neuronal development (CDP)
Y45G5AM.7	2	.[AG]ATCGAT[AT]	8.5	neuronal development (CDP)
Y51F10.10	2	.[AG]ATCGAT[AT]	8.5	neuronal development (CDP)
Y71H2AM.3	2	.[AG]ATCGAT[AT]	8.5	neuronal development (CDP)
Y73B3A.10	2	.[AG]ATCGAT[AT]	8.5	neuronal development (CDP)
Y73B6BL.5	2	.[AG]ATCGAT[AT]	8.5	neuronal development (CDP)
C09G12.9	3	.[AG]ATCGAT[AT]	6	neuronal development (CDP)
C30F12.4	3	.[AG]ATCGAT[AT]	6	neuronal development (CDP)
C48B6.3	3	.[AG]ATCGAT[AT]	6	neuronal development (CDP)
F15A4.10	3	.[AG]ATCGAT[AT]	6	neuronal development (CDP)
F20D1.4	3	.[AG]ATCGAT[AT]	6	neuronal development (CDP)
F21D5.2	3	.[AG]ATCGAT[AT]	6	neuronal development (CDP)
F40B1.2	3	.[AG]ATCGAT[AT]	6	neuronal development (CDP)
K11B4.2	3	.[AG]ATCGAT[AT]	6	neuronal development (CDP)
K12H4.2	3	.[AG]ATCGAT[AT]	6	neuronal development (CDP)
T05H10.4	3	.[AG]ATCGAT[AT]	6	neuronal development (CDP)
T23G11.7	3	.[AG]ATCGAT[AT]	6	neuronal development (CDP)
VW02B12L.4	3	.[AG]ATCGAT[AT]	6	neuronal development (CDP)
W09G3.3	3	.[AG]ATCGAT[AT]	6	neuronal development (CDP)
Y32F6A.1	3	.[AG]ATCGAT[AT]	6	neuronal development (CDP)
Y43F11A.3	3	.[AG]ATCGAT[AT]	6	neuronal development (CDP)
Y48G1BM.1	3	.[AG]ATCGAT[AT]	6	neuronal development (CDP)
Y53C10A.6	3	.[AG]ATCGAT[AT]	6	neuronal development (CDP)
Y55F3AM.4	3	.[AG]ATCGAT[AT]	6	neuronal development (CDP)
Y57A10A.7	3	.[AG]ATCGAT[AT]	6	neuronal development (CDP)
Y63D3A.4	3	.[AG]ATCGAT[AT]	6	neuronal development (CDP)
Y73B3A.3	3	.[AG]ATCGAT[AT]	6	neuronal development (CDP)
B0563.8	4	.[AG]ATCGAT[AT]	10.4	neuronal development (CDP)
C04E7.2	4	.[AG]ATCGAT[AT]	10.4	neuronal development (CDP)
C05E11.1	4	.[AG]ATCGAT[AT]	10.4	neuronal development (CDP)
C31E10.5	4	.[AG]ATCGAT[AT]	10.4	neuronal development (CDP)
C54G7.4	4	.[AG]ATCGAT[AT]	10.4	neuronal development (CDP)
F10E9.3	4	.[AG]ATCGAT[AT]	10.4	neuronal development (CDP)
F12F6.1	4	.[AG]ATCGAT[AT]	10.4	neuronal development (CDP)
F15D4.5	4	.[AG]ATCGAT[AT]	10.4	neuronal development (CDP)
F19C7.3	4	.[AG]ATCGAT[AT]	10.4	neuronal development (CDP)
F20D1.6	4	.[AG]ATCGAT[AT]	10.4	neuronal development (CDP)
F28H1.1	4	.[AG]ATCGAT[AT]	10.4	neuronal development (CDP)
F28H6.6	4	.[AG]ATCGAT[AT]	10.4	neuronal development (CDP)
F31D4.2	4	.[AG]ATCGAT[AT]	10.4	neuronal development (CDP)
F43C11.9	4	.[AG]ATCGAT[AT]	10.4	neuronal development (CDP)
F52D2.7	4	.[AG]ATCGAT[AT]	10.4	neuronal development (CDP)
F57C7.1	4	.[AG]ATCGAT[AT]	10.4	neuronal development (CDP)
K04C1.2	4	.[AG]ATCGAT[AT]	10.4	neuronal development (CDP)
M02D8.3	4	.[AG]ATCGAT[AT]	10.4	neuronal development (CDP)
M02E1.1	4	.[AG]ATCGAT[AT]	10.4	neuronal development (CDP)
M03C11.3	4	.[AG]ATCGAT[AT]	10.4	neuronal development (CDP)
M163.1	4	.[AG]ATCGAT[AT]	10.4	neuronal development (CDP)
R04A9.2	4	.[AG]ATCGAT[AT]	10.4	neuronal development (CDP)
R07B7.3	4	.[AG]ATCGAT[AT]	10.4	neuronal development (CDP)
R74.5	4	.[AG]ATCGAT[AT]	10.4	neuronal development (CDP)
T03D3.5	4	.[AG]ATCGAT[AT]	10.4	neuronal development (CDP)
T07A5.6	4	.[AG]ATCGAT[AT]	10.4	neuronal development (CDP)
T08A9.1	4	.[AG]ATCGAT[AT]	10.4	neuronal development (CDP)
T08D10.1	4	.[AG]ATCGAT[AT]	10.4	neuronal development (CDP)
T10D4.6	4	.[AG]ATCGAT[AT]	10.4	neuronal development (CDP)
T18D3.1	4	.[AG]ATCGAT[AT]	10.4	neuronal development (CDP)
VH15N14R.1	4	.[AG]ATCGAT[AT]	10.4	neuronal development (CDP)
W01C8.3	4	.[AG]ATCGAT[AT]	10.4	neuronal development (CDP)
W06E11.7	4	.[AG]ATCGAT[AT]	10.4	neuronal development (CDP)
W08G11.3	4	.[AG]ATCGAT[AT]	10.4	neuronal development (CDP)
Y18H1A.2	4	.[AG]ATCGAT[AT]	10.4	neuronal development (CDP)
Y40B1A.3	4	.[AG]ATCGAT[AT]	10.4	neuronal development (CDP)
Y43F4B.3	4	.[AG]ATCGAT[AT]	10.4	neuronal development (CDP)
Y47D3A.27	4	.[AG]ATCGAT[AT]	10.4	neuronal development (CDP)
Y47D9A.2	4	.[AG]ATCGAT[AT]	10.4	neuronal development (CDP)
Y47G6A.4	4	.[AG]ATCGAT[AT]	10.4	neuronal development (CDP)
Y48E1C.1	4	.[AG]ATCGAT[AT]	10.4	neuronal development (CDP)
Y50D7A.8	4	.[AG]ATCGAT[AT]	10.4	neuronal development (CDP)
Y51H4A.12	4	.[AG]ATCGAT[AT]	10.4	neuronal development (CDP)
Y54E5A.7	4	.[AG]ATCGAT[AT]	10.4	neuronal development (CDP)
Y54G9A.6	4	.[AG]ATCGAT[AT]	10.4	neuronal development (CDP)
Y57A10A.9	4	.[AG]ATCGAT[AT]	10.4	neuronal development (CDP)
Y69H2.7	4	.[AG]ATCGAT[AT]	10.4	neuronal development (CDP)
Y6D1A.1	4	.[AG]ATCGAT[AT]	10.4	neuronal development (CDP)
Y75B8A.8	4	.[AG]ATCGAT[AT]	10.4	neuronal development (CDP)
ZC204.11	4	.[AG]ATCGAT[AT]	10.4	neuronal development (CDP)
B0025.4	5	.[AG]ATCGAT[AT]	8.8	neuronal development (CDP)
B0511.7	5	.[AG]ATCGAT[AT]	8.8	neuronal development (CDP)
B0563.1	5	.[AG]ATCGAT[AT]	8.8	neuronal development (CDP)
C05D10.3	5	.[AG]ATCGAT[AT]	8.8	neuronal development (CDP)
C06E2.5	5	.[AG]ATCGAT[AT]	8.8	neuronal development (CDP)
C08A9.7	5	.[AG]ATCGAT[AT]	8.8	neuronal development (CDP)
C09E9.1	5	.[AG]ATCGAT[AT]	8.8	neuronal development (CDP)
C16C10.4	5	.[AG]ATCGAT[AT]	8.8	neuronal development (CDP)
C24F3.1	5	.[AG]ATCGAT[AT]	8.8	neuronal development (CDP)
C24H11.5	5	.[AG]ATCGAT[AT]	8.8	neuronal development (CDP)
C25B8.4	5	.[AG]ATCGAT[AT]	8.8	neuronal development (CDP)
C27B7.2	5	.[AG]ATCGAT[AT]	8.8	neuronal development (CDP)
C33E10.1	5	.[AG]ATCGAT[AT]	8.8	neuronal development (CDP)
C36E6.2	5	.[AG]ATCGAT[AT]	8.8	neuronal development (CDP)
C52E2.2	5	.[AG]ATCGAT[AT]	8.8	neuronal development (CDP)
C52E2.8	5	.[AG]ATCGAT[AT]	8.8	neuronal development (CDP)
D2013.3	5	.[AG]ATCGAT[AT]	8.8	neuronal development (CDP)
D2085.2	5	.[AG]ATCGAT[AT]	8.8	neuronal development (CDP)
E01A2.5	5	.[AG]ATCGAT[AT]	8.8	neuronal development (CDP)
E01B7.2	5	.[AG]ATCGAT[AT]	8.8	neuronal development (CDP)
F10G2.4	5	.[AG]ATCGAT[AT]	8.8	neuronal development (CDP)
F15B10.3	5	.[AG]ATCGAT[AT]	8.8	neuronal development (CDP)
F26A3.2	5	.[AG]ATCGAT[AT]	8.8	neuronal development (CDP)
F26D10.12	5	.[AG]ATCGAT[AT]	8.8	neuronal development (CDP)
F38A5.7	5	.[AG]ATCGAT[AT]	8.8	neuronal development (CDP)
F47D12.5	5	.[AG]ATCGAT[AT]	8.8	neuronal development (CDP)
F54C4.4	5	.[AG]ATCGAT[AT]	8.8	neuronal development (CDP)
F56A8.8	5	.[AG]ATCGAT[AT]	8.8	neuronal development (CDP)
F58E1.2	5	.[AG]ATCGAT[AT]	8.8	neuronal development (CDP)
H20J04.8	5	.[AG]ATCGAT[AT]	8.8	neuronal development (CDP)
K08H2.4	5	.[AG]ATCGAT[AT]	8.8	neuronal development (CDP)
R03A10.1	5	.[AG]ATCGAT[AT]	8.8	neuronal development (CDP)
T13B5.8	5	.[AG]ATCGAT[AT]	8.8	neuronal development (CDP)
T17A3.6	5	.[AG]ATCGAT[AT]	8.8	neuronal development (CDP)
W04A8.5	5	.[AG]ATCGAT[AT]	8.8	neuronal development (CDP)
W05H7.4	5	.[AG]ATCGAT[AT]	8.8	neuronal development (CDP)
W06A11.4	5	.[AG]ATCGAT[AT]	8.8	neuronal development (CDP)
Y106G6H.10	5	.[AG]ATCGAT[AT]	8.8	neuronal development (CDP)
Y113G7B.8	5	.[AG]ATCGAT[AT]	8.8	neuronal development (CDP)
Y37E11B.6	5	.[AG]ATCGAT[AT]	8.8	neuronal development (CDP)
Y48A6B.5	5	.[AG]ATCGAT[AT]	8.8	neuronal development (CDP)
Y48A6C.2	5	.[AG]ATCGAT[AT]	8.8	neuronal development (CDP)
Y54E10A.5	5	.[AG]ATCGAT[AT]	8.8	neuronal development (CDP)
Y54E10BR.6	5	.[AG]ATCGAT[AT]	8.8	neuronal development (CDP)
Y57A10A.29	5	.[AG]ATCGAT[AT]	8.8	neuronal development (CDP)
Y57G11C.13	5	.[AG]ATCGAT[AT]	8.8	neuronal development (CDP)
Y57G11C.33	5	.[AG]ATCGAT[AT]	8.8	neuronal development (CDP)
Y63D3A.2	5	.[AG]ATCGAT[AT]	8.8	neuronal development (CDP)
Y71G10AL.1	5	.[AG]ATCGAT[AT]	8.8	neuronal development (CDP)
Y71H2AM.6	5	.[AG]ATCGAT[AT]	8.8	neuronal development (CDP)
Y71H2AR.3	5	.[AG]ATCGAT[AT]	8.8	neuronal development (CDP)
Y73B6BL.30	5	.[AG]ATCGAT[AT]	8.8	neuronal development (CDP)
Y73C8C.3	5	.[AG]ATCGAT[AT]	8.8	neuronal development (CDP)
Y73E7A.5	5	.[AG]ATCGAT[AT]	8.8	neuronal development (CDP)
Y75B8A.31	5	.[AG]ATCGAT[AT]	8.8	neuronal development (CDP)
Y76B12C.3	5	.[AG]ATCGAT[AT]	8.8	neuronal development (CDP)
Y97E10AR.5	5	.[AG]ATCGAT[AT]	8.8	neuronal development (CDP)
ZC132.4	5	.[AG]ATCGAT[AT]	8.8	neuronal development (CDP)
ZK353.9	5	.[AG]ATCGAT[AT]	8.8	neuronal development (CDP)
ZK616.2	5	.[AG]ATCGAT[AT]	8.8	neuronal development (CDP)
ZK822.2	5	.[AG]ATCGAT[AT]	8.8	neuronal development (CDP)
C06A5.6	7	.[AG]ATCGAT[AT]	5.6	neuronal development (CDP)
C08B6.7	7	.[AG]ATCGAT[AT]	5.6	neuronal development (CDP)
F12A10.8	7	.[AG]ATCGAT[AT]	5.6	neuronal development (CDP)
PAR2.4	7	.[AG]ATCGAT[AT]	5.6	neuronal development (CDP)
R11A5.2	7	.[AG]ATCGAT[AT]	5.6	neuronal development (CDP)
B0001.8	2	.CGA[AC]G[AC]A[ACT]	11.4	reproduction
B0024.10	2	.CGA[AC]G[AC]A[ACT]	11.4	reproduction
C05C8.9	2	.CGA[AC]G[AC]A[ACT]	11.4	reproduction
C09D4.4	2	.CGA[AC]G[AC]A[ACT]	11.4	reproduction
C26E6.7	2	.CGA[AC]G[AC]A[ACT]	11.4	reproduction
C27C12.1	2	.CGA[AC]G[AC]A[ACT]	11.4	reproduction
C27C12.2	2	.CGA[AC]G[AC]A[ACT]	11.4	reproduction
C27H6.8	2	.CGA[AC]G[AC]A[ACT]	11.4	reproduction
C32D5.5	2	.CGA[AC]G[AC]A[ACT]	11.4	reproduction
C34B7.2	2	.CGA[AC]G[AC]A[ACT]	11.4	reproduction
C34E10.3	2	.CGA[AC]G[AC]A[ACT]	11.4	reproduction
C34E10.5	2	.CGA[AC]G[AC]A[ACT]	11.4	reproduction
C35A5.8	2	.CGA[AC]G[AC]A[ACT]	11.4	reproduction
C36B1.5	2	.CGA[AC]G[AC]A[ACT]	11.4	reproduction
C44E4.5	2	.CGA[AC]G[AC]A[ACT]	11.4	reproduction
C46F11.3	2	.CGA[AC]G[AC]A[ACT]	11.4	reproduction
C50B8.3	2	.CGA[AC]G[AC]A[ACT]	11.4	reproduction
C56A3.5	2	.CGA[AC]G[AC]A[ACT]	11.4	reproduction
C56C10.1	2	.CGA[AC]G[AC]A[ACT]	11.4	reproduction
D1007.7	2	.CGA[AC]G[AC]A[ACT]	11.4	reproduction
D2013.9	2	.CGA[AC]G[AC]A[ACT]	11.4	reproduction
D2023.6	2	.CGA[AC]G[AC]A[ACT]	11.4	reproduction
F02E9.10	2	.CGA[AC]G[AC]A[ACT]	11.4	reproduction
F09E5.5	2	.CGA[AC]G[AC]A[ACT]	11.4	reproduction
F10G7.9	2	.CGA[AC]G[AC]A[ACT]	11.4	reproduction
F10G8.9	2	.CGA[AC]G[AC]A[ACT]	11.4	reproduction
F11A10.4	2	.CGA[AC]G[AC]A[ACT]	11.4	reproduction
F11E6.7	2	.CGA[AC]G[AC]A[ACT]	11.4	reproduction
F17A9.2	2	.CGA[AC]G[AC]A[ACT]	11.4	reproduction
F20C5.1	2	.CGA[AC]G[AC]A[ACT]	11.4	reproduction
F22D6.7	2	.CGA[AC]G[AC]A[ACT]	11.4	reproduction
F25H2.6	2	.CGA[AC]G[AC]A[ACT]	11.4	reproduction
F26F12.3	2	.CGA[AC]G[AC]A[ACT]	11.4	reproduction
F31E8.6	2	.CGA[AC]G[AC]A[ACT]	11.4	reproduction
F37C12.13	2	.CGA[AC]G[AC]A[ACT]	11.4	reproduction
F39C12.1	2	.CGA[AC]G[AC]A[ACT]	11.4	reproduction
F44E2.3	2	.CGA[AC]G[AC]A[ACT]	11.4	reproduction
F49E8.1	2	.CGA[AC]G[AC]A[ACT]	11.4	reproduction
F53C11.5	2	.CGA[AC]G[AC]A[ACT]	11.4	reproduction
H28O16.2	2	.CGA[AC]G[AC]A[ACT]	11.4	reproduction
JC8.13	2	.CGA[AC]G[AC]A[ACT]	11.4	reproduction
JC8.2	2	.CGA[AC]G[AC]A[ACT]	11.4	reproduction
JC8.7	2	.CGA[AC]G[AC]A[ACT]	11.4	reproduction
K04G2.3	2	.CGA[AC]G[AC]A[ACT]	11.4	reproduction
K04G2.8	2	.CGA[AC]G[AC]A[ACT]	11.4	reproduction
R05D11.6	2	.CGA[AC]G[AC]A[ACT]	11.4	reproduction
R05D11.8	2	.CGA[AC]G[AC]A[ACT]	11.4	reproduction
R11D1.1	2	.CGA[AC]G[AC]A[ACT]	11.4	reproduction
R186.7	2	.CGA[AC]G[AC]A[ACT]	11.4	reproduction
T02C12.4	2	.CGA[AC]G[AC]A[ACT]	11.4	reproduction
T04A8.15	2	.CGA[AC]G[AC]A[ACT]	11.4	reproduction
T10B11.6	2	.CGA[AC]G[AC]A[ACT]	11.4	reproduction
T12D8.1	2	.CGA[AC]G[AC]A[ACT]	11.4	reproduction
T16H12.3	2	.CGA[AC]G[AC]A[ACT]	11.4	reproduction
T23B5.3	2	.CGA[AC]G[AC]A[ACT]	11.4	reproduction
T23G11.5	2	.CGA[AC]G[AC]A[ACT]	11.4	reproduction
W03A5.5	2	.CGA[AC]G[AC]A[ACT]	11.4	reproduction
W10D9.4	2	.CGA[AC]G[AC]A[ACT]	11.4	reproduction
Y105E8A.21	2	.CGA[AC]G[AC]A[ACT]	11.4	reproduction
Y108F1.4	2	.CGA[AC]G[AC]A[ACT]	11.4	reproduction
Y18D10A.3	2	.CGA[AC]G[AC]A[ACT]	11.4	reproduction
Y32H12A.7	2	.CGA[AC]G[AC]A[ACT]	11.4	reproduction
Y37D8A.13	2	.CGA[AC]G[AC]A[ACT]	11.4	reproduction
Y42H9AR.4	2	.CGA[AC]G[AC]A[ACT]	11.4	reproduction
Y48C3A.20	2	.CGA[AC]G[AC]A[ACT]	11.4	reproduction
Y53C12A.4	2	.CGA[AC]G[AC]A[ACT]	11.4	reproduction
Y57A10A.8	2	.CGA[AC]G[AC]A[ACT]	11.4	reproduction
Y57G11C.43	2	.CGA[AC]G[AC]A[ACT]	11.4	reproduction
Y67H2A.1	2	.CGA[AC]G[AC]A[ACT]	11.4	reproduction
ZK1128.2	2	.CGA[AC]G[AC]A[ACT]	11.4	reproduction
ZK1128.6	2	.CGA[AC]G[AC]A[ACT]	11.4	reproduction
ZK643.5	2	.CGA[AC]G[AC]A[ACT]	11.4	reproduction
ZK829.7	2	.CGA[AC]G[AC]A[ACT]	11.4	reproduction
ZK945.4	2	.CGA[AC]G[AC]A[ACT]	11.4	reproduction
C01A2.6	7	.CGA[AC]G[AC]A[ACT]	4.3	reproduction
ZK430.8	11	.CGA[AC]G[AC]A[ACT]	11.4	reproduction
F35H10.3	1	.A[CG][ACT]TAAG[ACT]	5	rhodopsin-like activity (EVI1)
Y119D3B.6	1	.A[CG][ACT]TAAG[ACT]	5	rhodopsin-like activity (EVI1)
B0403.3	9	[ACT]A[CG]TA[CGT]AC[ACT]	5.5	signal transduction
C04C11.1	9	[ACT]A[CG]TA[CGT]AC[ACT]	5.5	signal transduction
C27B7.7	9	[ACT]A[CG]TA[CGT]AC[ACT]	5.5	signal transduction
C45G9.6	9	[ACT]A[CG]TA[CGT]AC[ACT]	5.5	signal transduction
D1054.5	9	[ACT]A[CG]TA[CGT]AC[ACT]	5.5	signal transduction
F43C9.1	9	[ACT]A[CG]TA[CGT]AC[ACT]	5.5	signal transduction
F46H5.8	9	[ACT]A[CG]TA[CGT]AC[ACT]	5.5	signal transduction
K08D8.4	9	[ACT]A[CG]TA[CGT]AC[ACT]	5.5	signal transduction
R05G6.1	9	[ACT]A[CG]TA[CGT]AC[ACT]	5.5	signal transduction
R08E3.1	9	[ACT]A[CG]TA[CGT]AC[ACT]	5.5	signal transduction
T16G1.7	9	[ACT]A[CG]TA[CGT]AC[ACT]	5.5	signal transduction
Y105C5A.8	9	[ACT]A[CG]TA[CGT]AC[ACT]	5.5	signal transduction
Y38C1AA.9	9	[ACT]A[CG]TA[CGT]AC[ACT]	5.5	signal transduction
Y44A6E.1	9	[ACT]A[CG]TA[CGT]AC[ACT]	5.5	signal transduction
Y50D4B.3	9	[ACT]A[CG]TA[CGT]AC[ACT]	5.5	signal transduction
Y50E8A.3	9	[ACT]A[CG]TA[CGT]AC[ACT]	5.5	signal transduction
ZK250.5	9	[ACT]A[CG]TA[CGT]AC[ACT]	5.5	signal transduction
F29C12.3	2	.G[GT]ACTCC[AT]	4.8	vulval development (ADR-1)
T13F2.7	2	.G[GT]ACTCC[AT]	4.8	vulval development (ADR-1)
T20D3.9	2	.G[GT]ACTCC[AT]	4.8	vulval development (ADR-1)
Y32H12A.2	2	.G[GT]ACTCC[AT]	4.8	vulval development (ADR-1)
C15H11.5	2	.TCCACG[ACG].	6.5	vulval development (O2)
C16A3.8	2	.TCCACG[ACG].	6.5	vulval development (O2)
C50F4.12	2	.TCCACG[ACG].	6.5	vulval development (O2)
F08F8.9	2	.TCCACG[ACG].	6.5	vulval development (O2)
F12F6.5	2	.TCCACG[ACG].	6.5	vulval development (O2)
F20G4.1	2	.TCCACG[ACG].	6.5	vulval development (O2)
F42H10.7	2	.TCCACG[ACG].	6.5	vulval development (O2)
T26A5.6	2	.TCCACG[ACG].	6.5	vulval development (O2)
Y76B12C.7	2	.TCCACG[ACG].	6.5	vulval development (O2)
B0035.6	3	.TCCACG[ACG].	5.4	vulval development (O2)
C50E3.13	3	.TCCACG[ACG].	5.4	vulval development (O2)
F28D1.4	3	.TCCACG[ACG].	5.4	vulval development (O2)
Y95B8A.11	3	.TCCACG[ACG].	5.4	vulval development (O2)
ZK353.7	3	.TCCACG[ACG].	5.4	vulval development (O2)
